# Supplementary material for: Gene Expression Profiles Link Respiratory Viral Infection, Platelet Response to Aspirin, and Acute Myocardial Infarction
Source: PubMed Central journal article supplement (PMC4507878; doi:10.1371/journal.pone.0132259), 2015-07-20

H1N1 : 200665\_s\_at

P-Value for Mixed Model (null vs just timecourse): 0.0004772

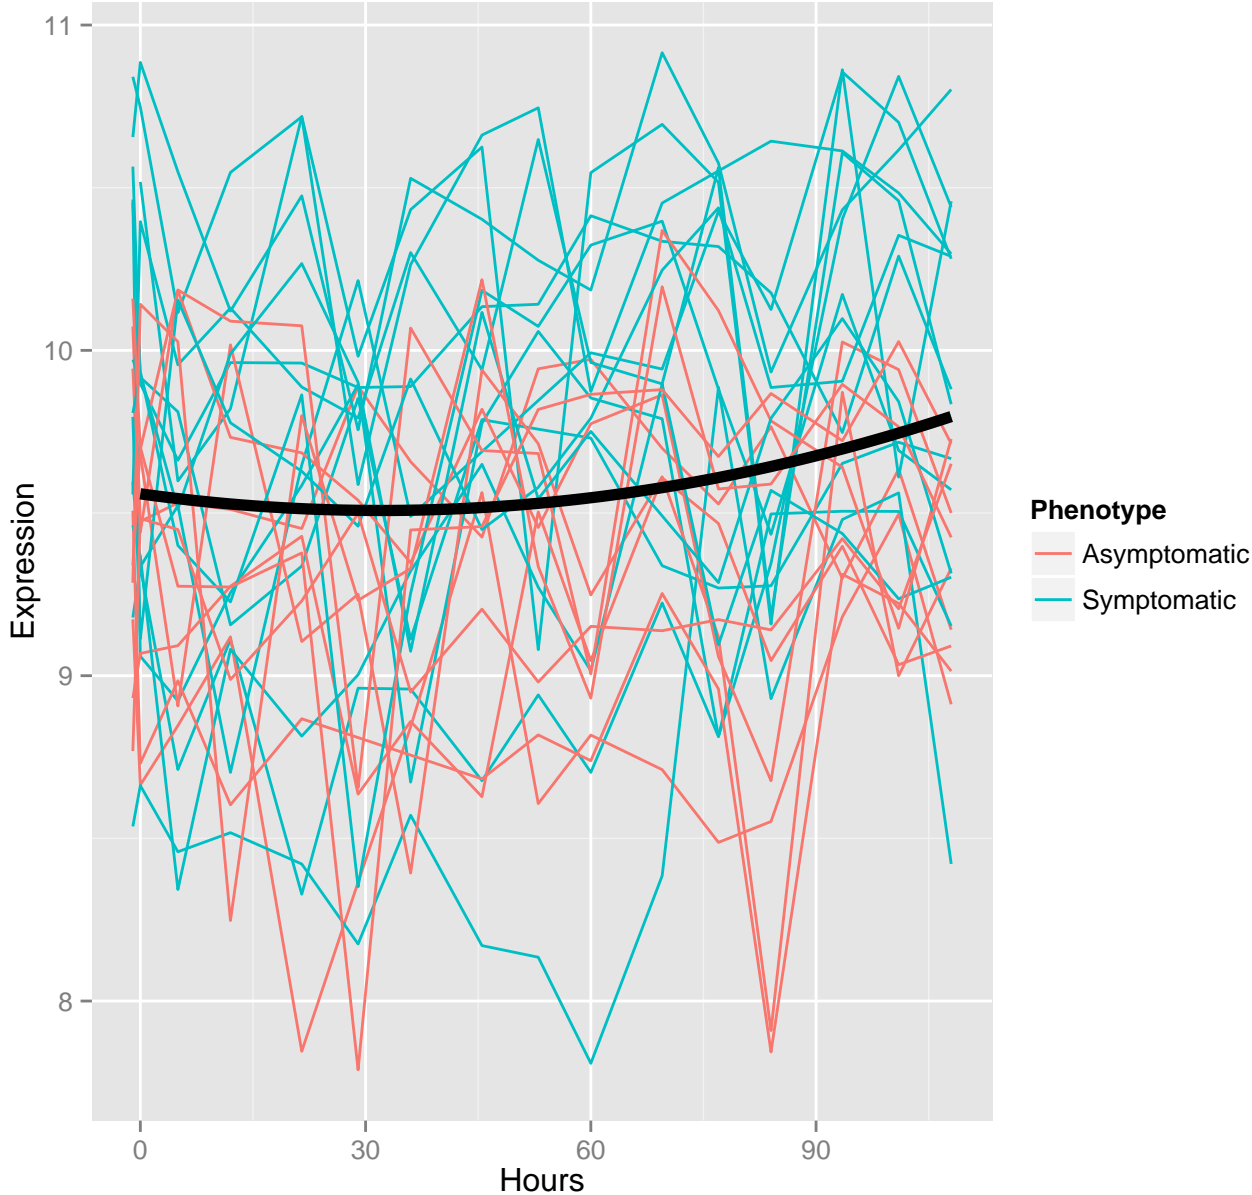

H1N1 : 201058\_s\_at

P-Value for Mixed Model (null vs just timecourse): 0.0001318

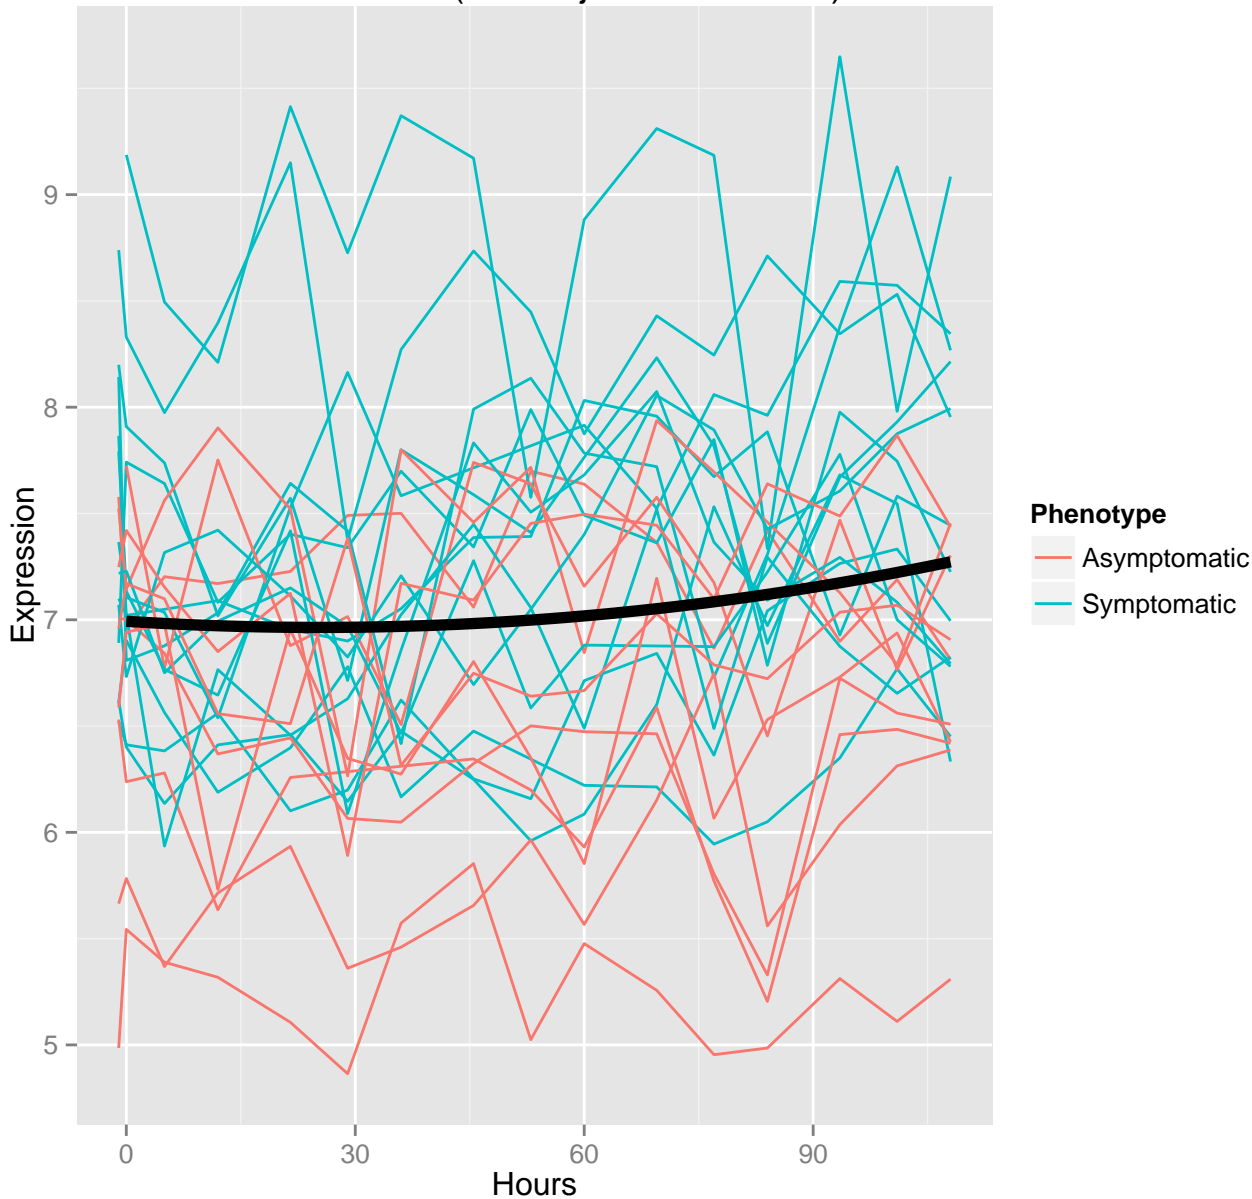

H1N1 : 201059\_at

P-Value for Mixed Model (null vs just timecourse): 0.001172

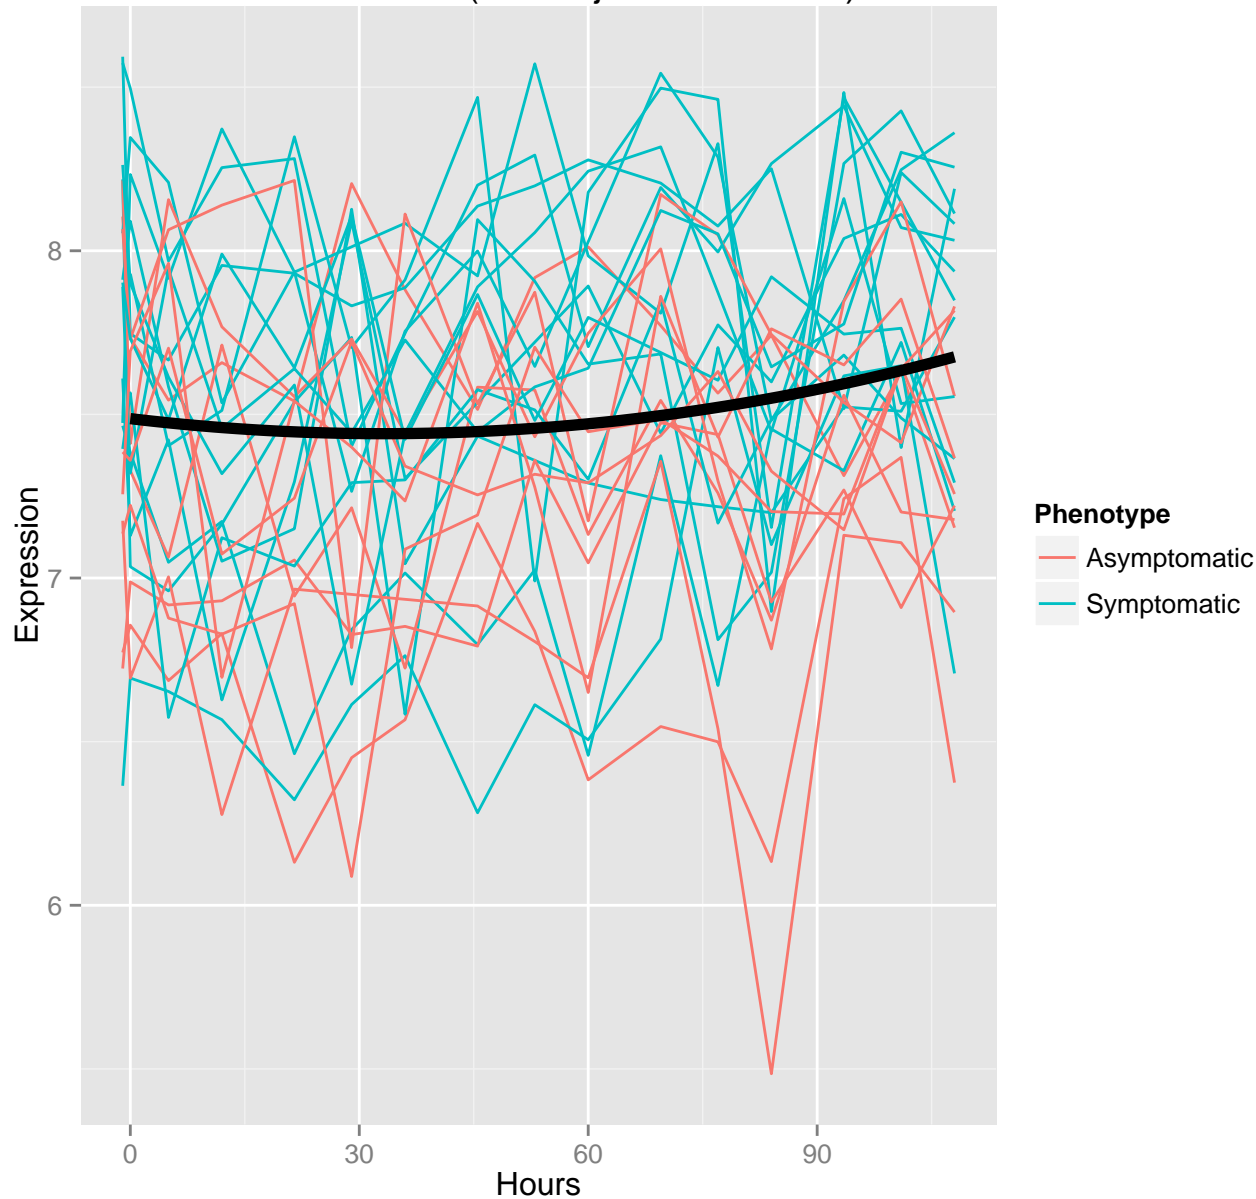

H1N1 : 201108\_s\_at

P-Value for Mixed Model (null vs just timecourse): 0.009471

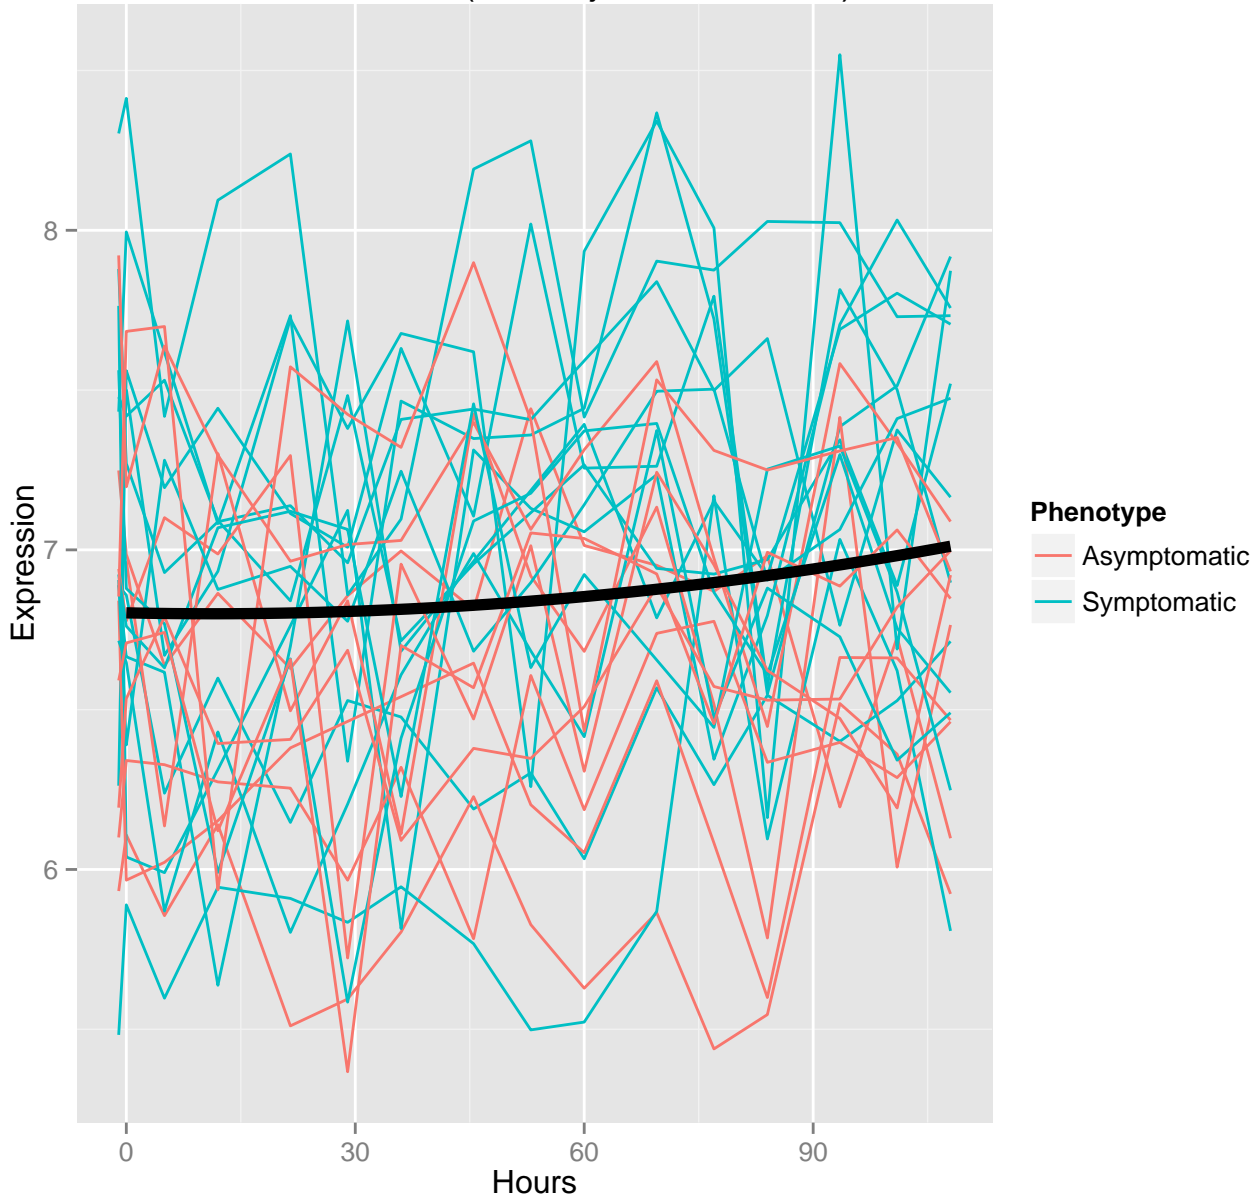

H1N1 : 201906\_s\_at

P-Value for Mixed Model (null vs just timecourse): 0.01849

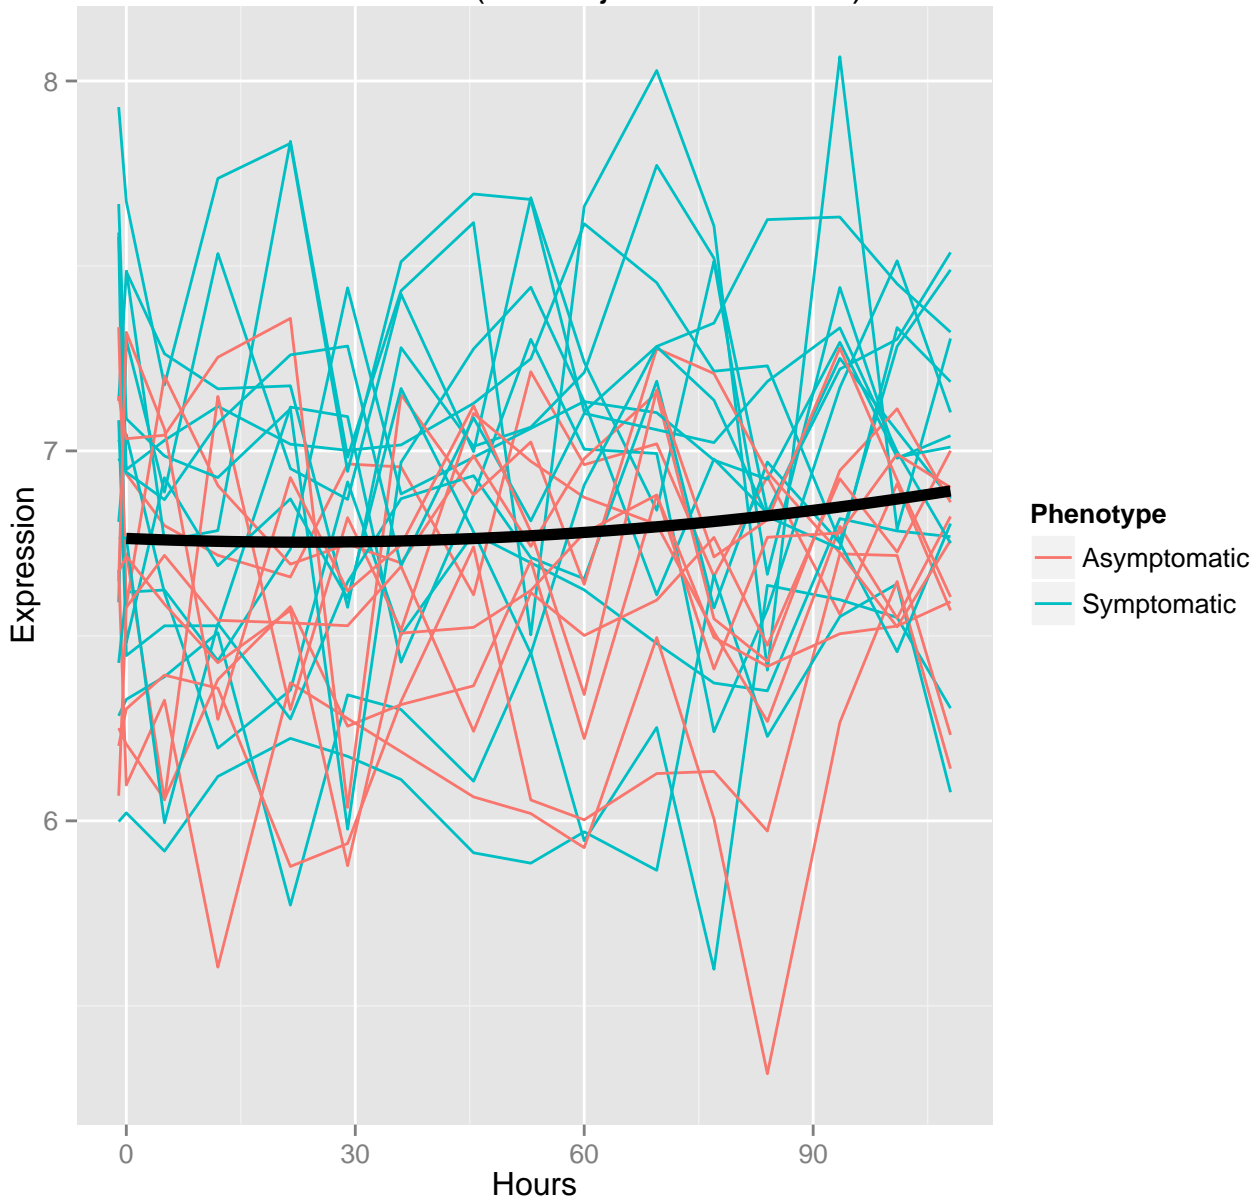

H1N1 : 203414\_at

P-Value for Mixed Model (null vs just timecourse):  $8.345e-05$

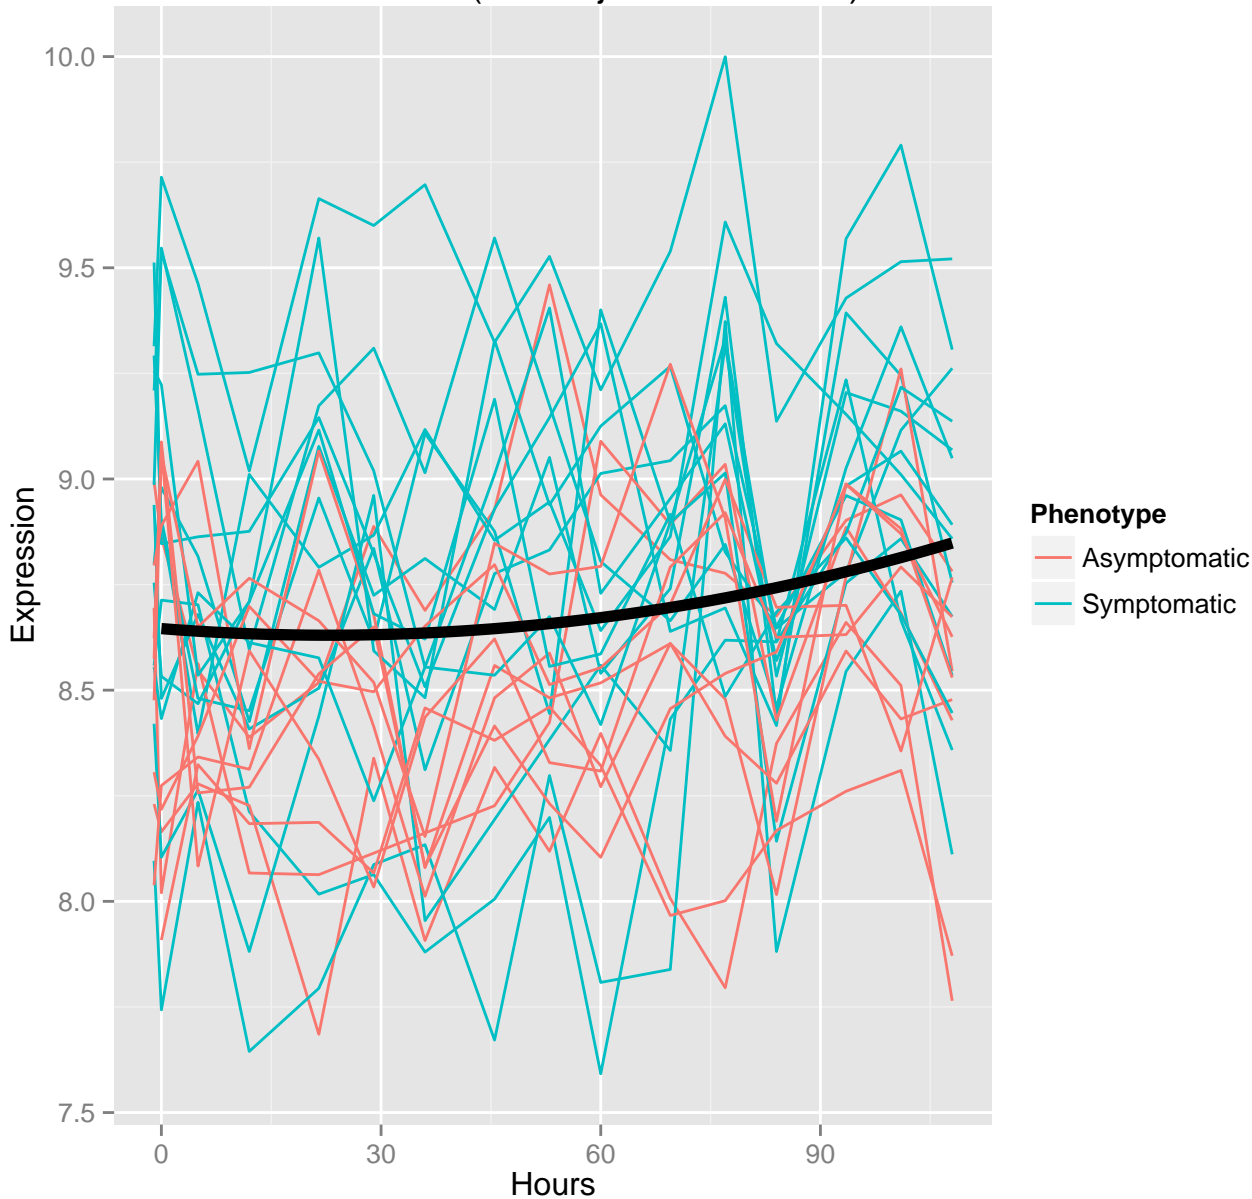

H1N1 : 203680\_at

P-Value for Mixed Model (null vs just timecourse):  $2.689e-07$

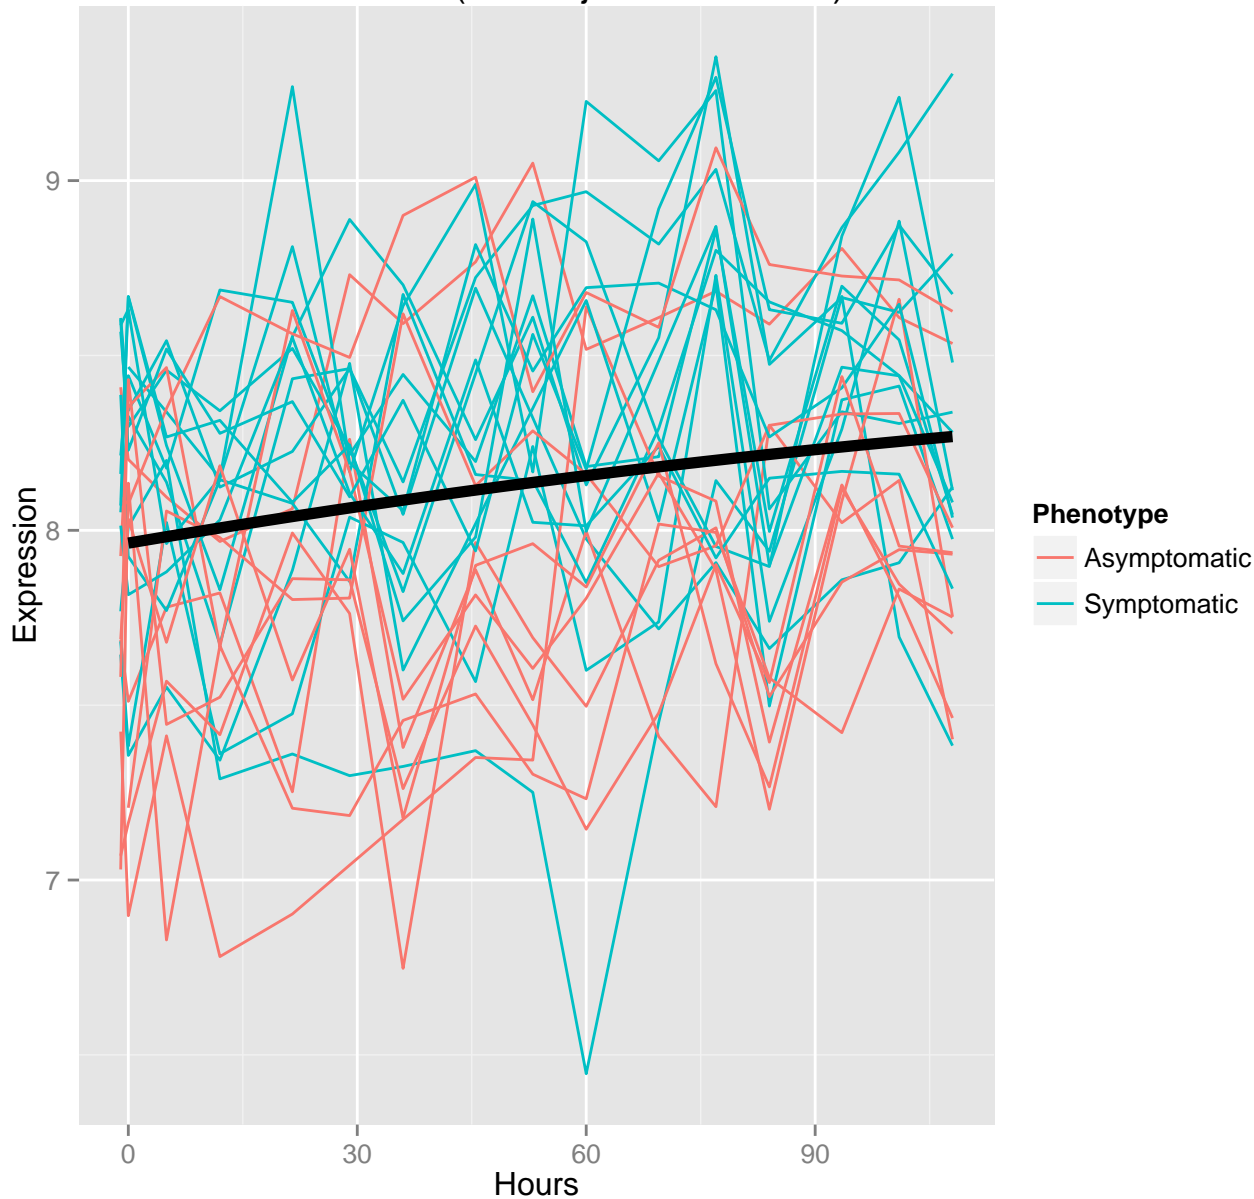

H1N1 : 203817\_at

P-Value for Mixed Model (null vs just timecourse):  $1.577e-10$

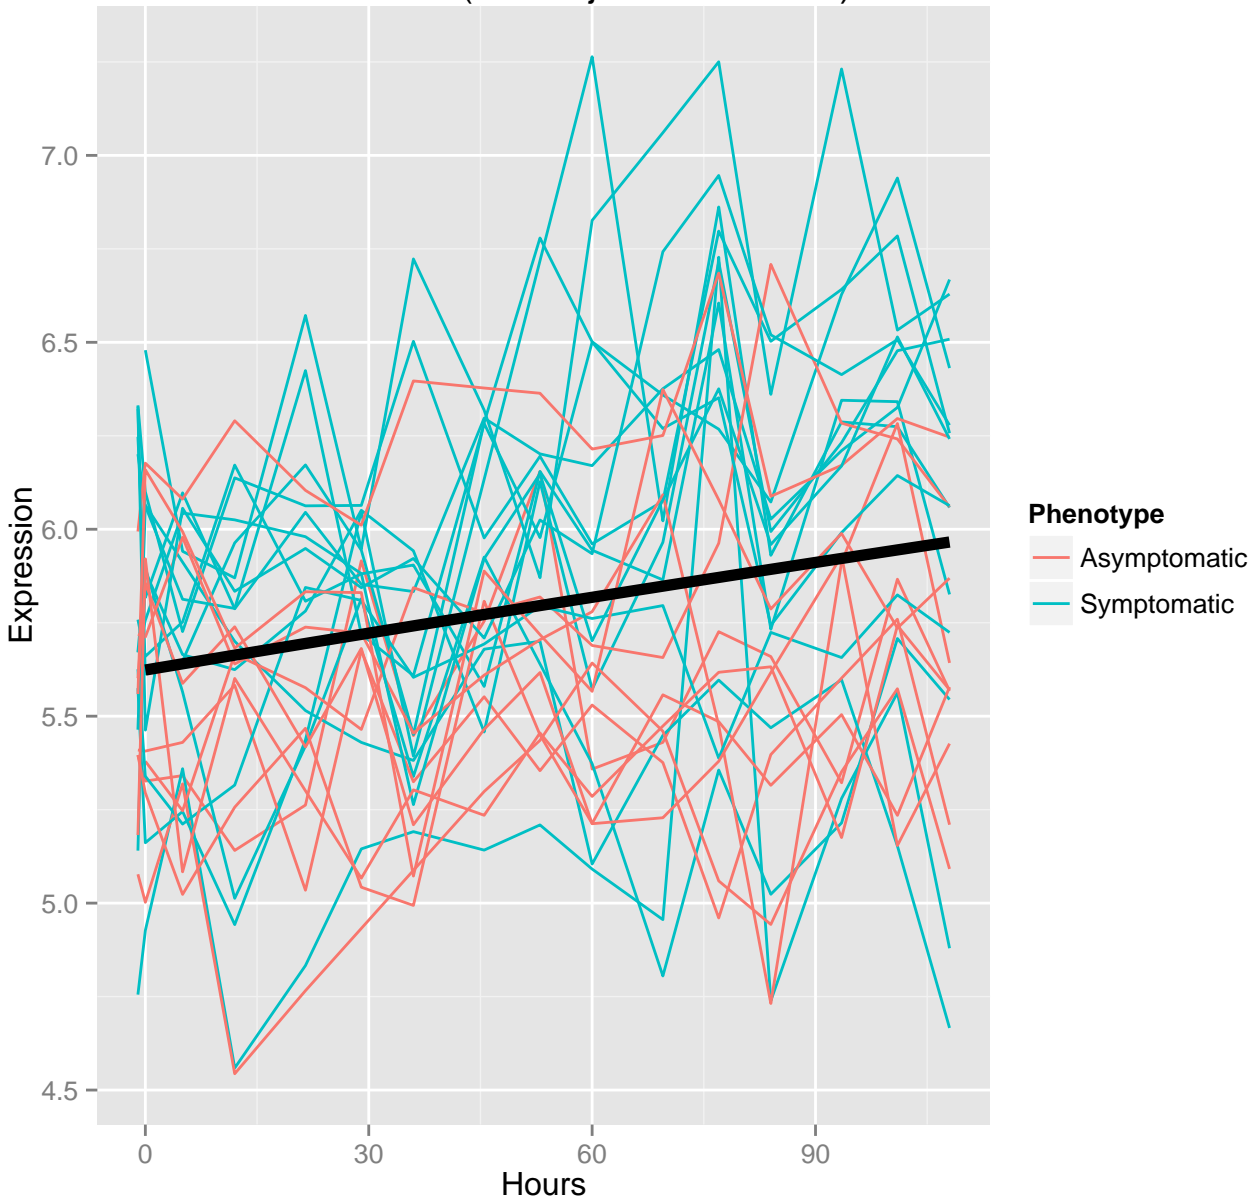



H1N1 : 203819\_s\_at

P-Value for Mixed Model (null vs just timecourse):  $2.639e-11$

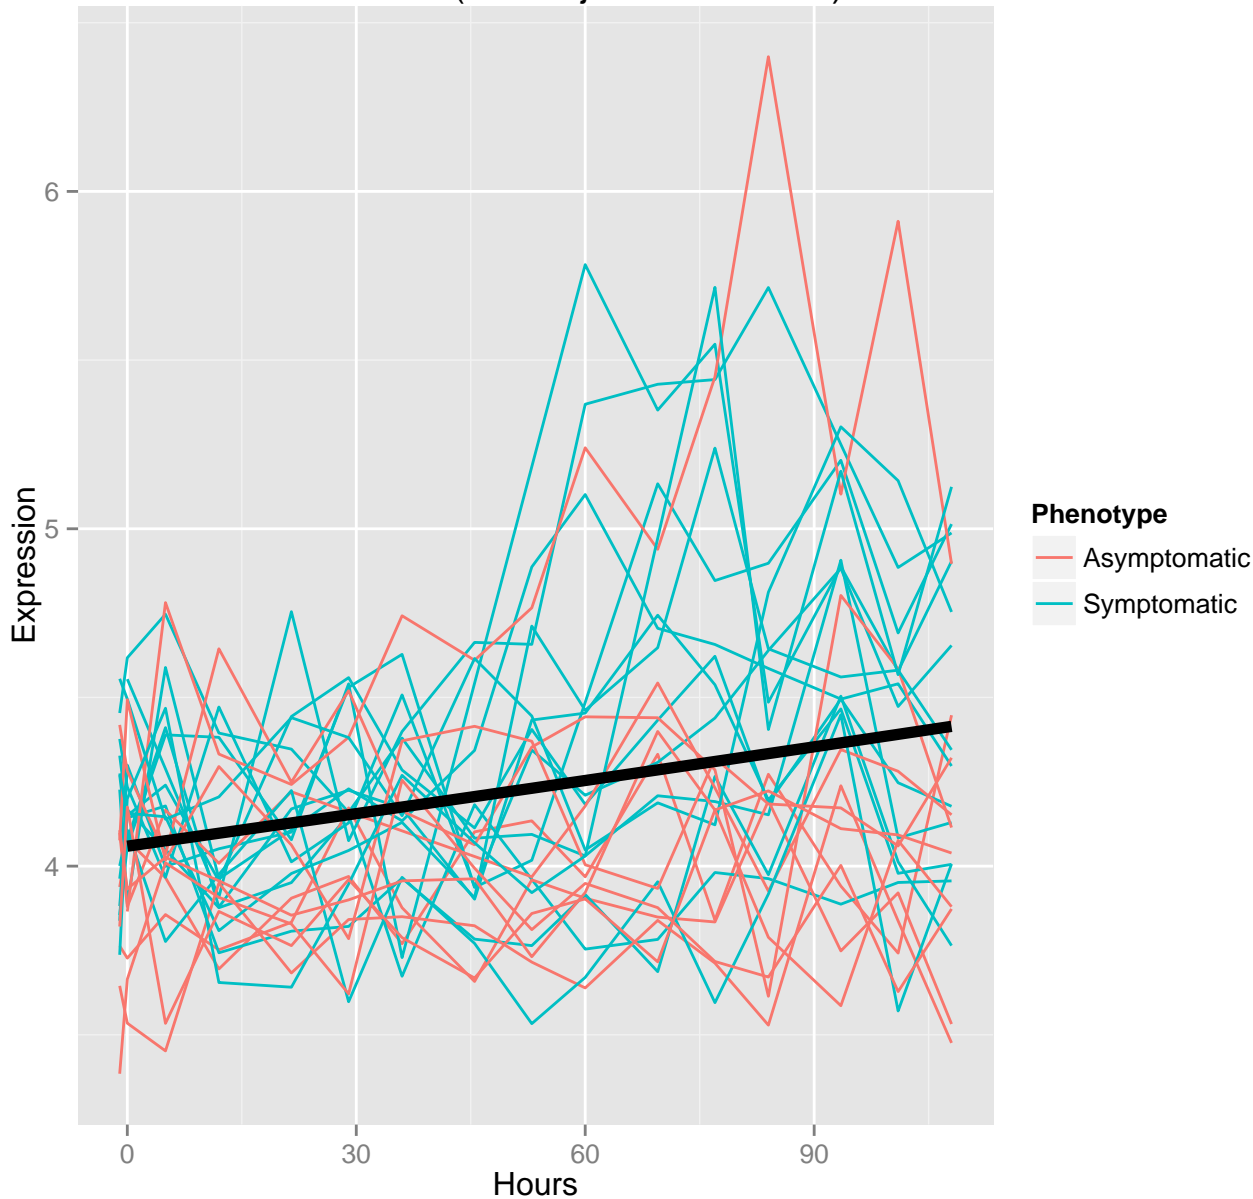

H1N1 : 204115\_at

P-Value for Mixed Model (null vs just timecourse):  $5.712e-08$

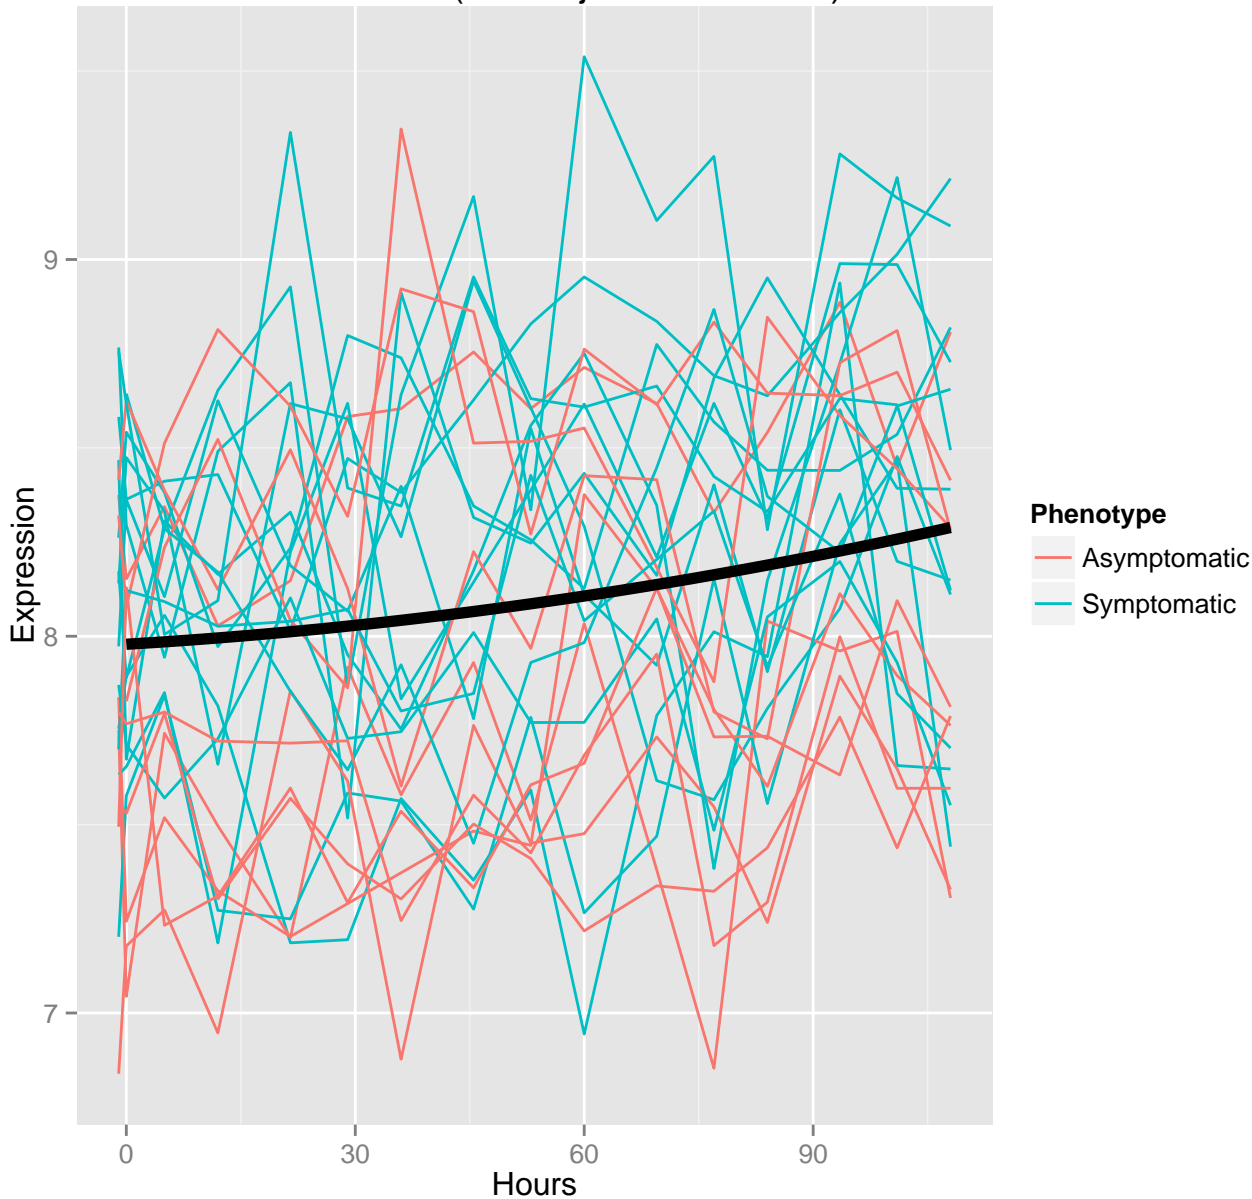

H1N1 : 204628\_s\_at

P-Value for Mixed Model (null vs just timecourse):  $9e-09$

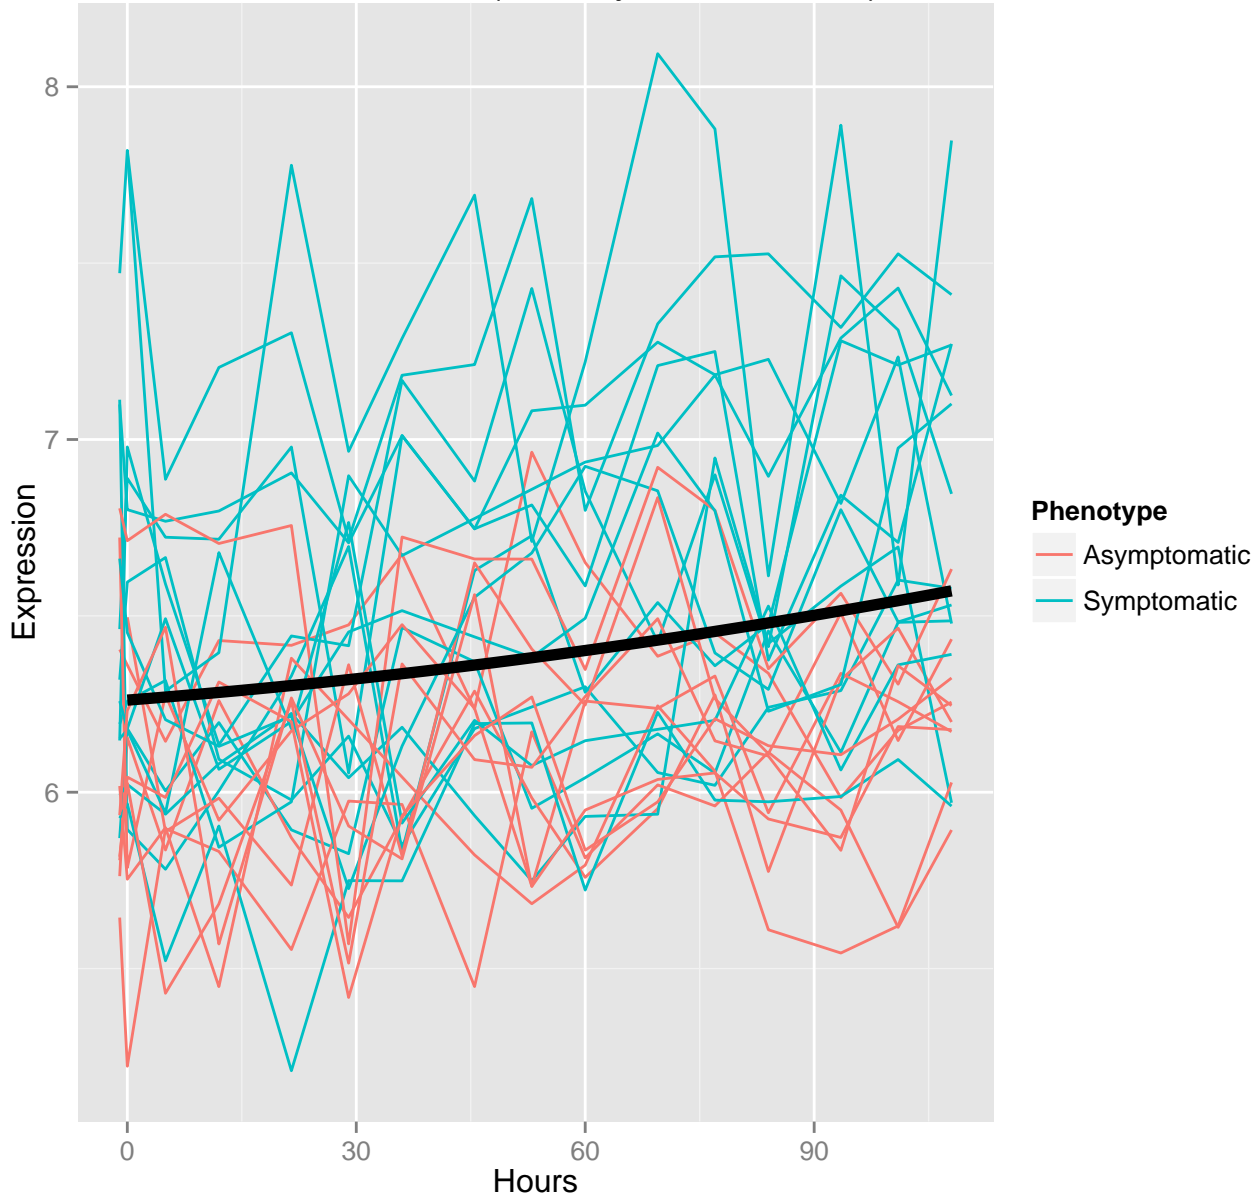

H1N1 : 206049\_at

P-Value for Mixed Model (null vs just timecourse):  $4.933e-05$

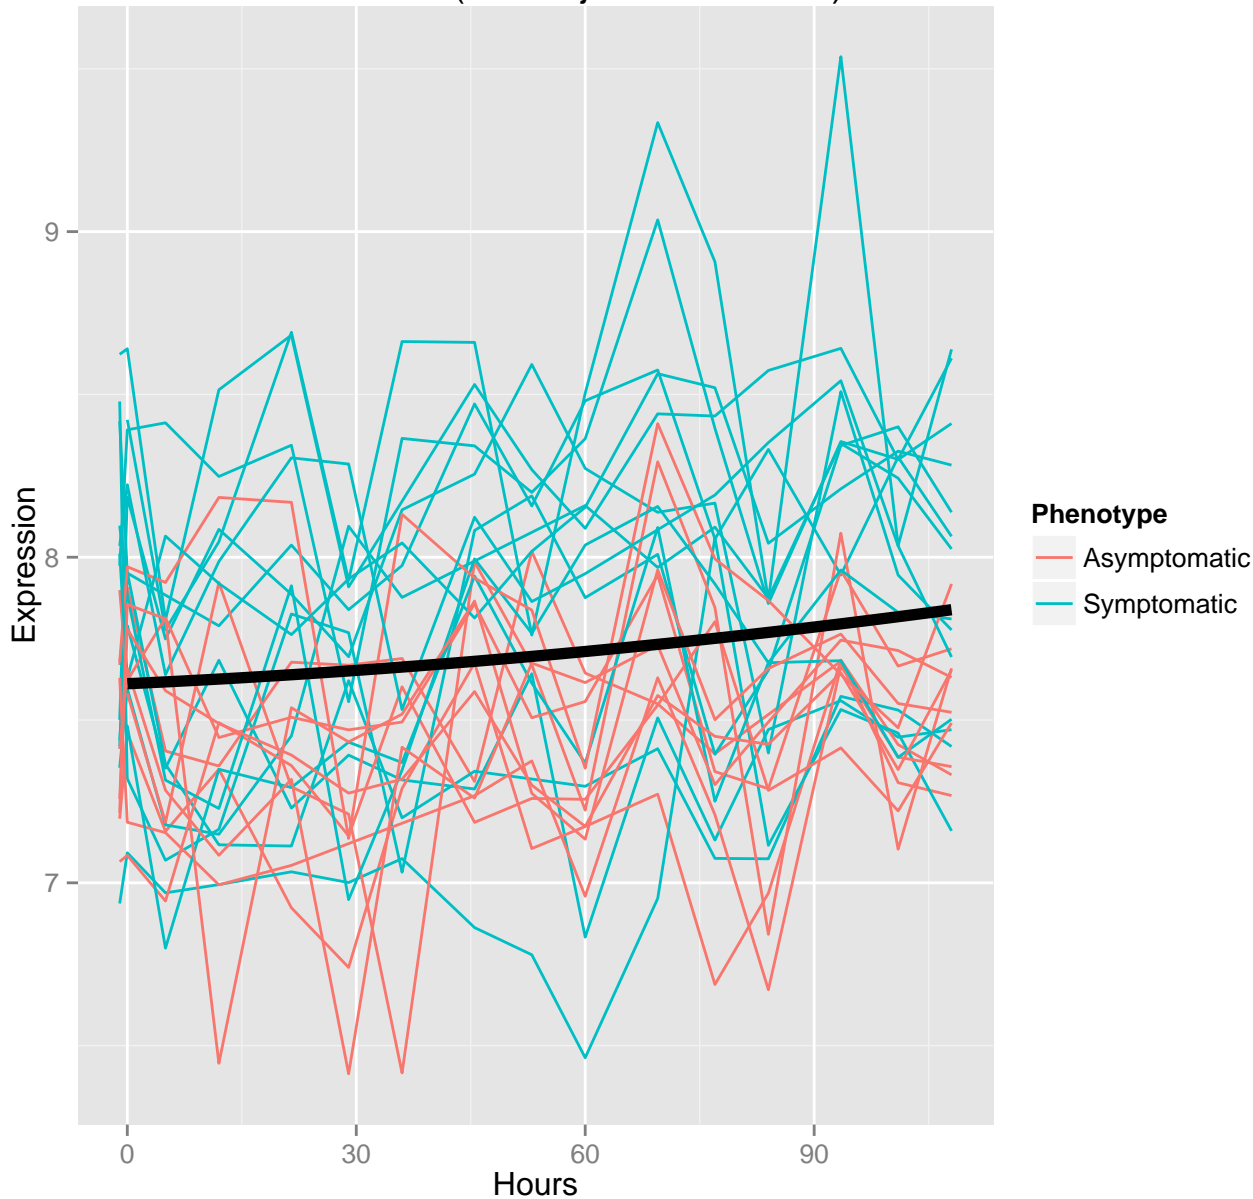

H1N1 : 206110\_at

P-Value for Mixed Model (null vs just timecourse): 0.0002825

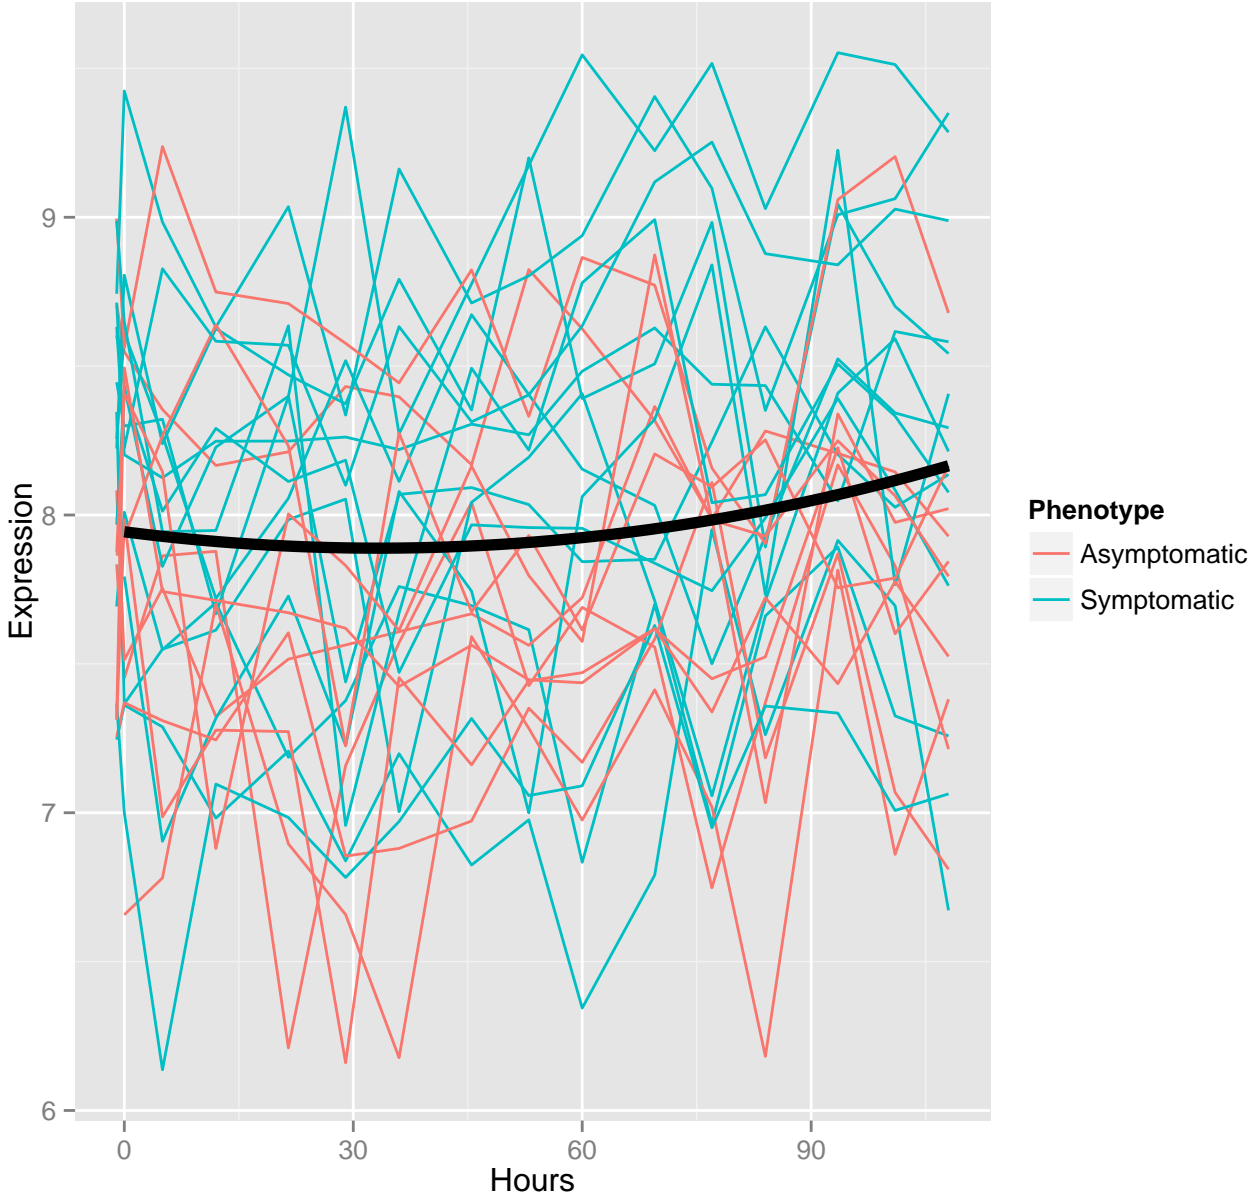

H1N1 : 206167\_s\_at

P-Value for Mixed Model (null vs just timecourse): 0.001713

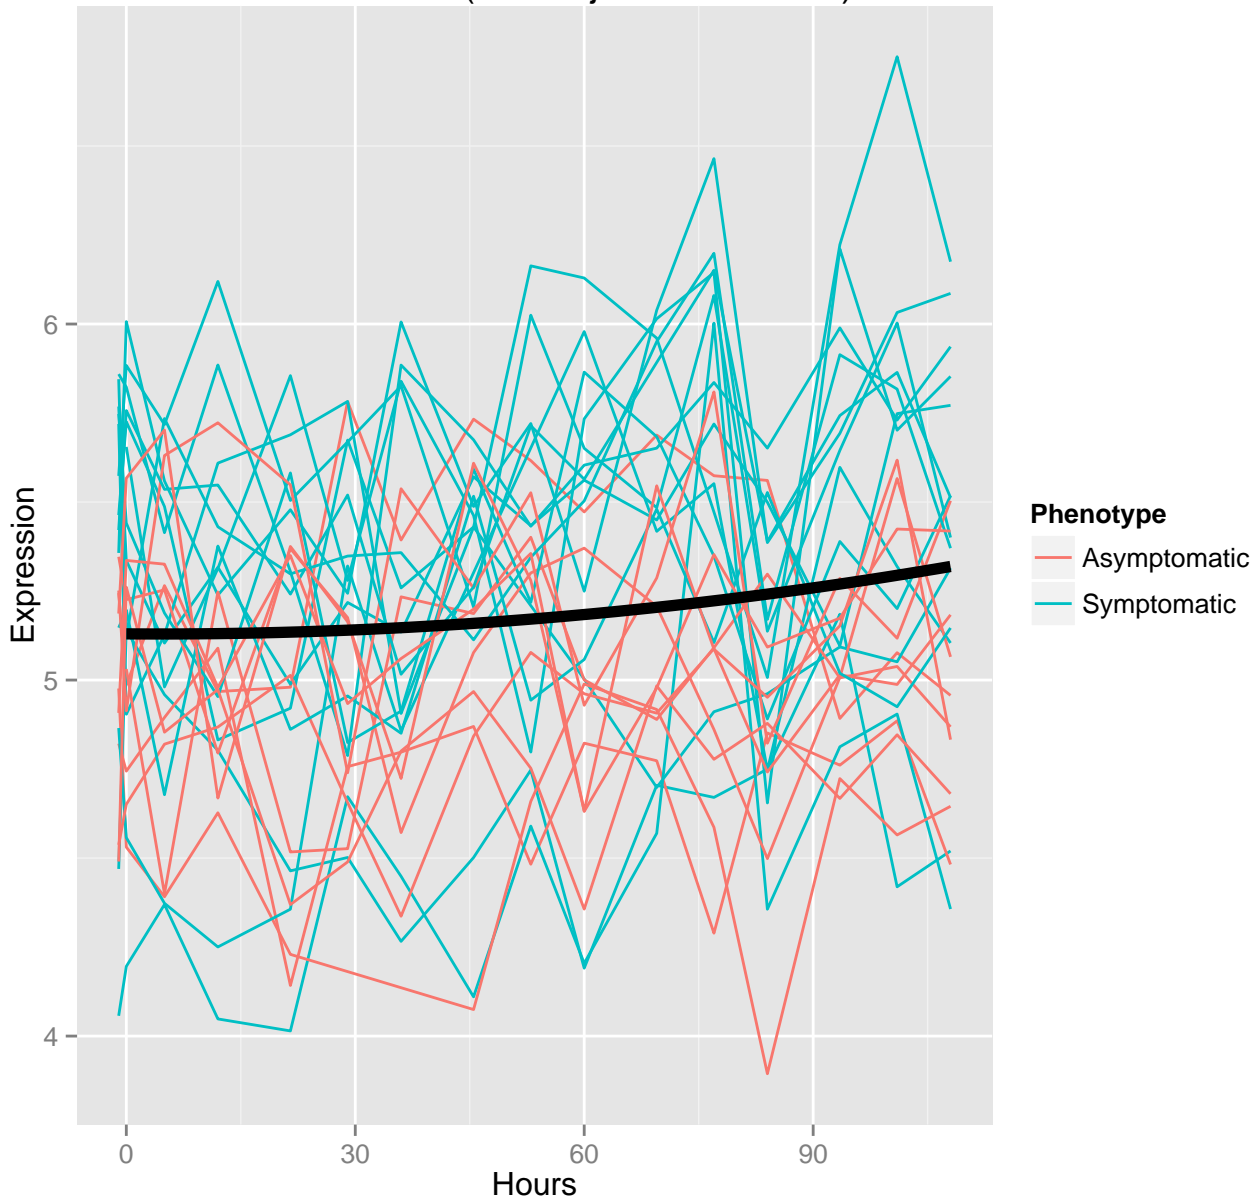

H1N1 : 206390\_x\_at

P-Value for Mixed Model (null vs just timecourse):  $2.328e-07$

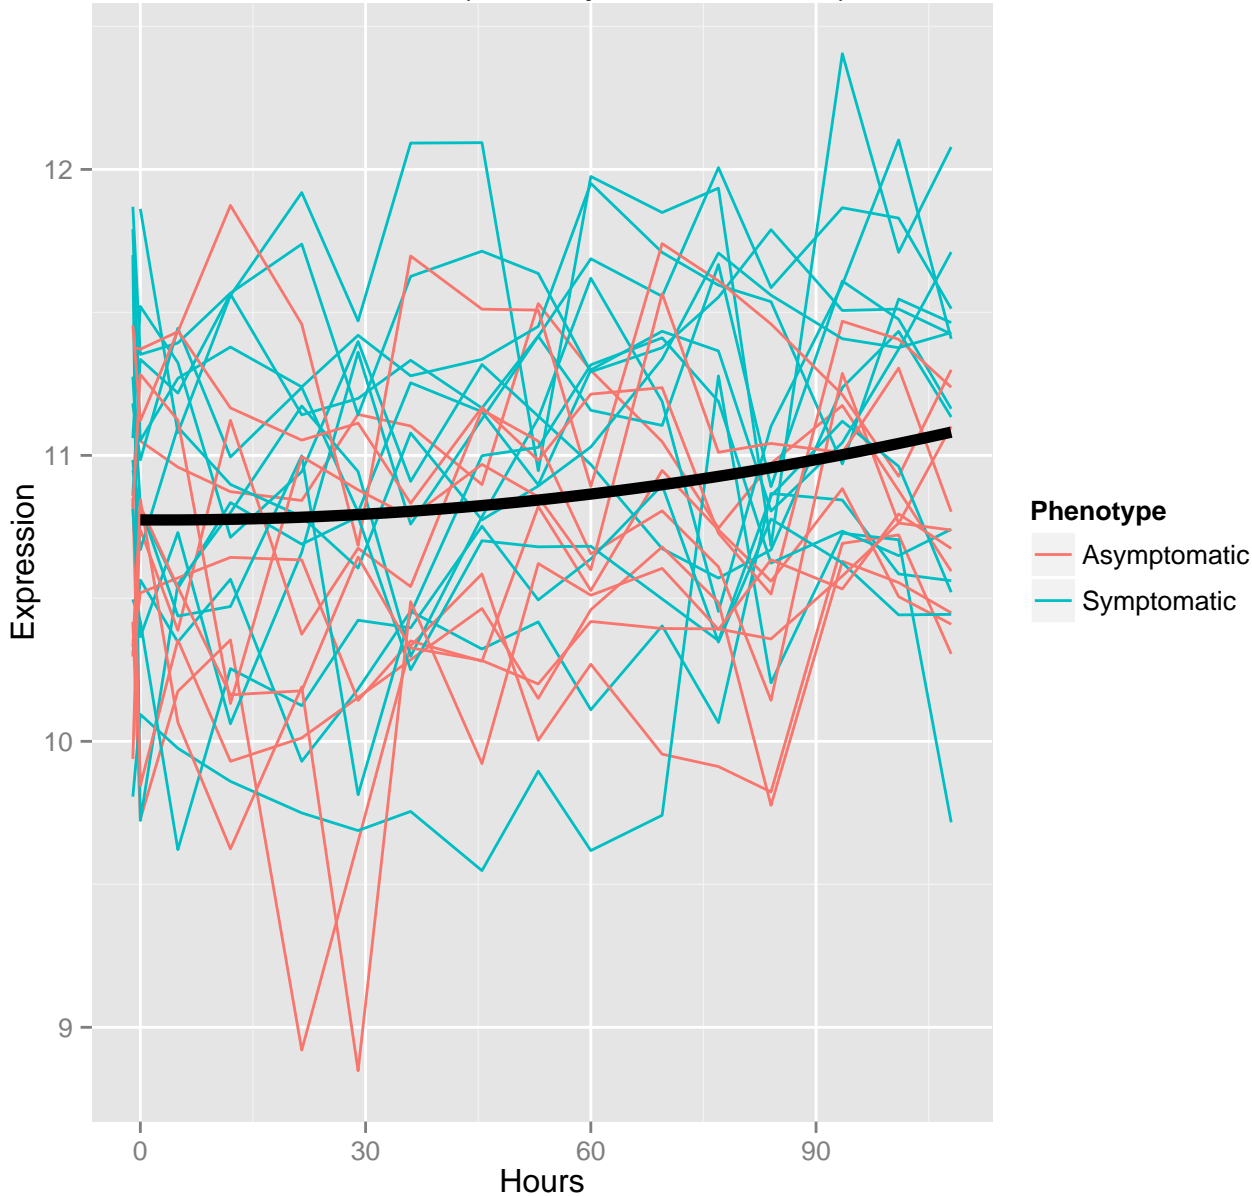

H1N1 : 206493\_at

P-Value for Mixed Model (null vs just timecourse): 0.003863

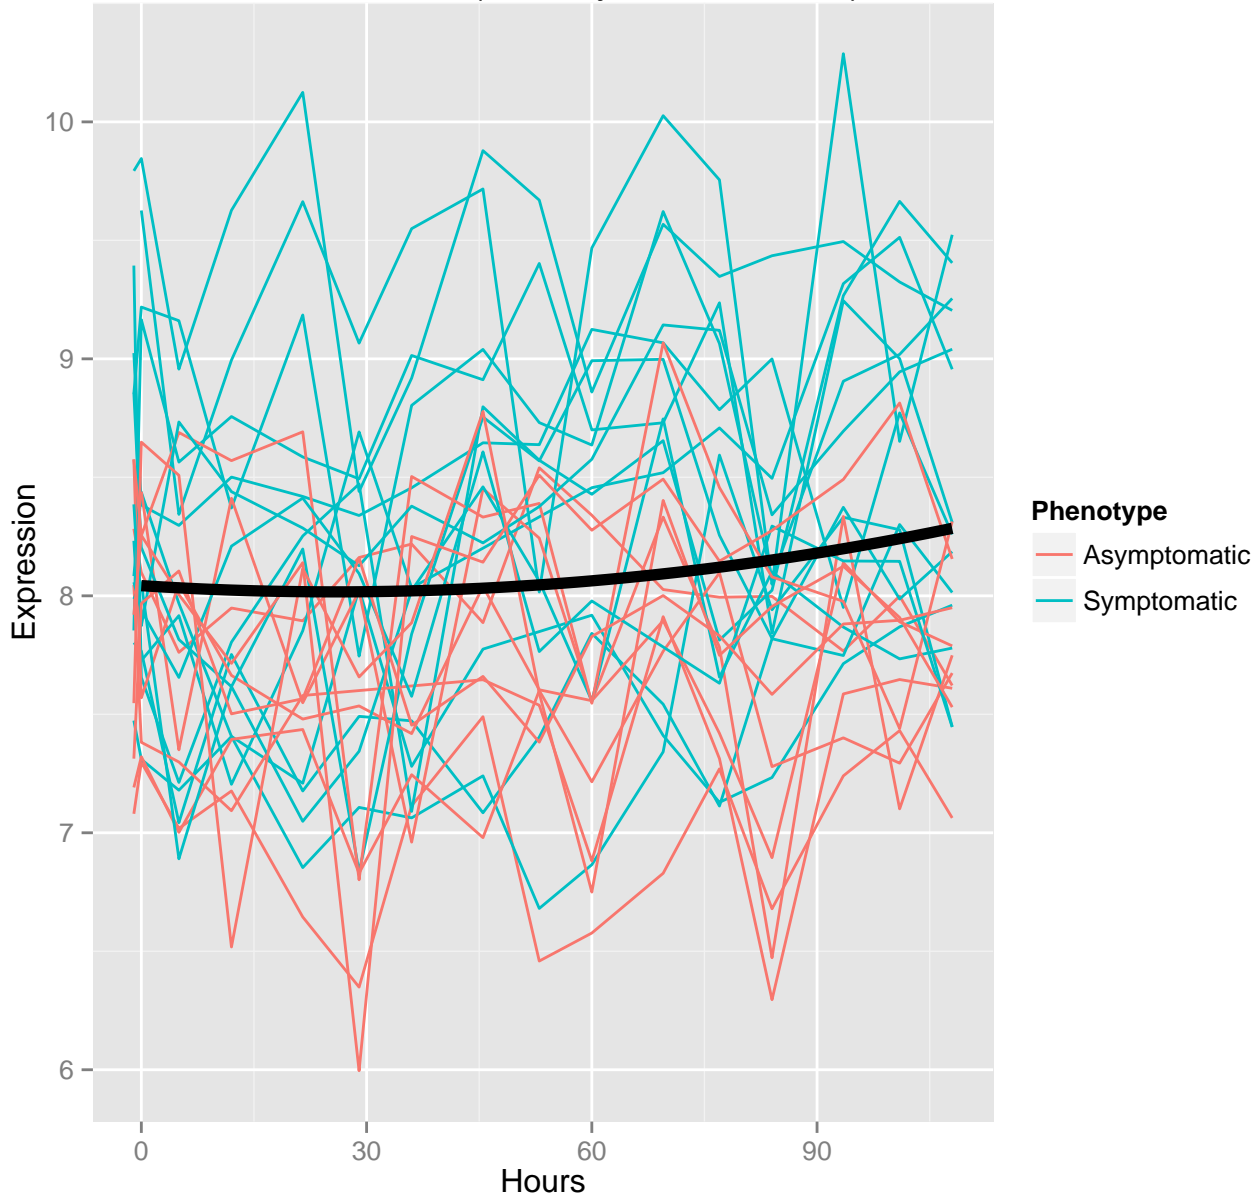



H1N1 : 206494\_s\_at

P-Value for Mixed Model (null vs just timecourse): 0.0002625

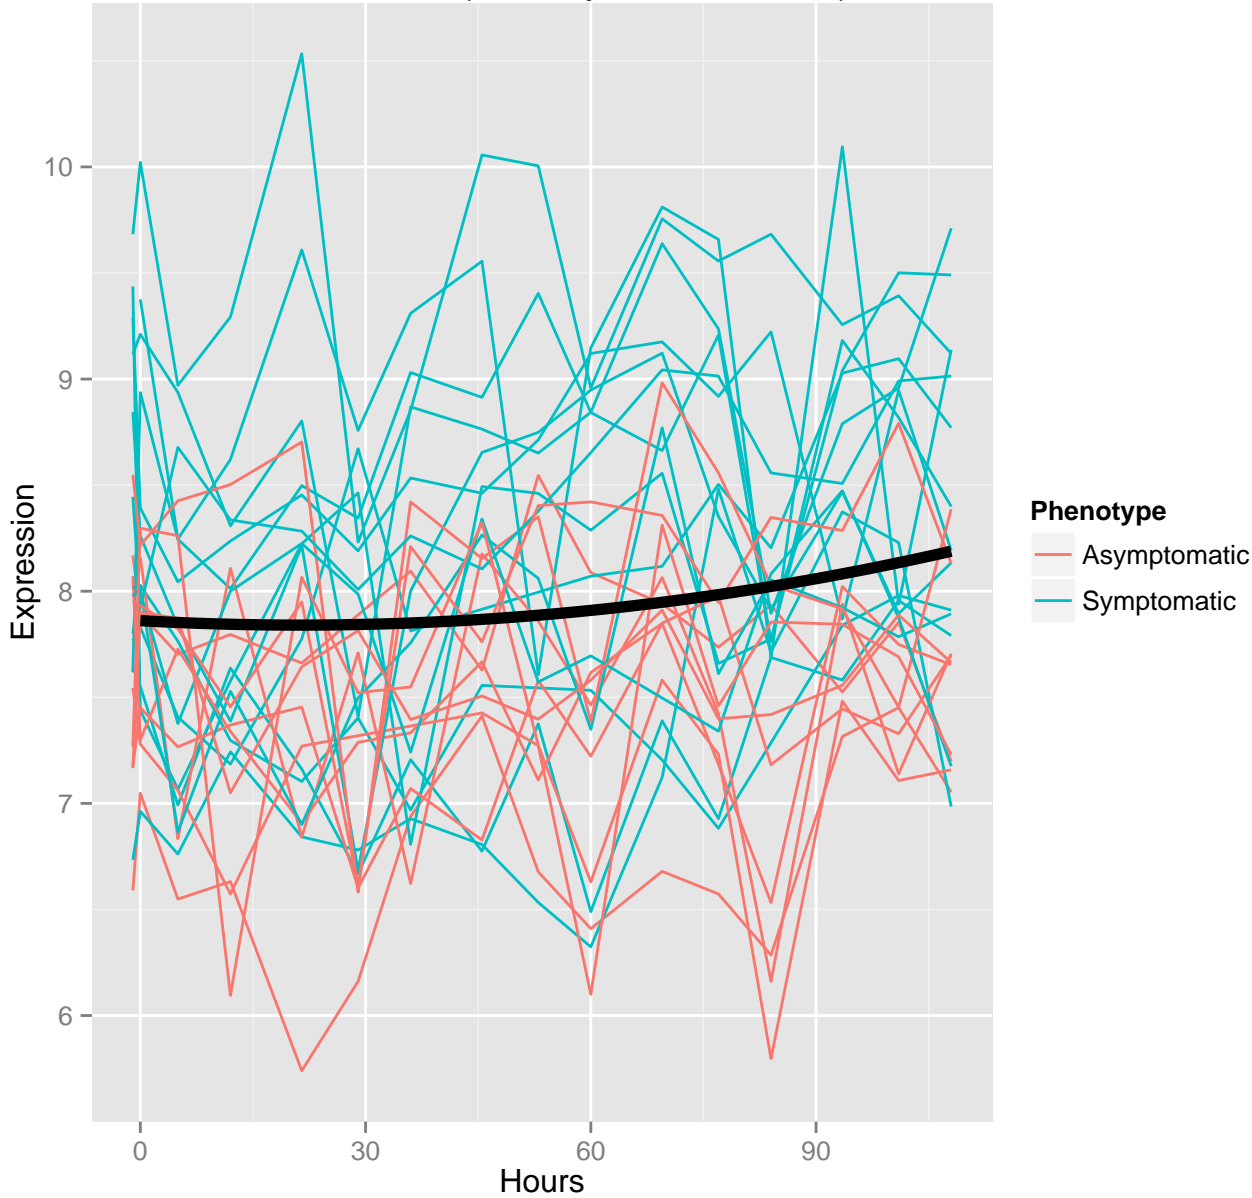

H1N1 : 206655\_s\_at

P-Value for Mixed Model (null vs just timecourse): 0.001527

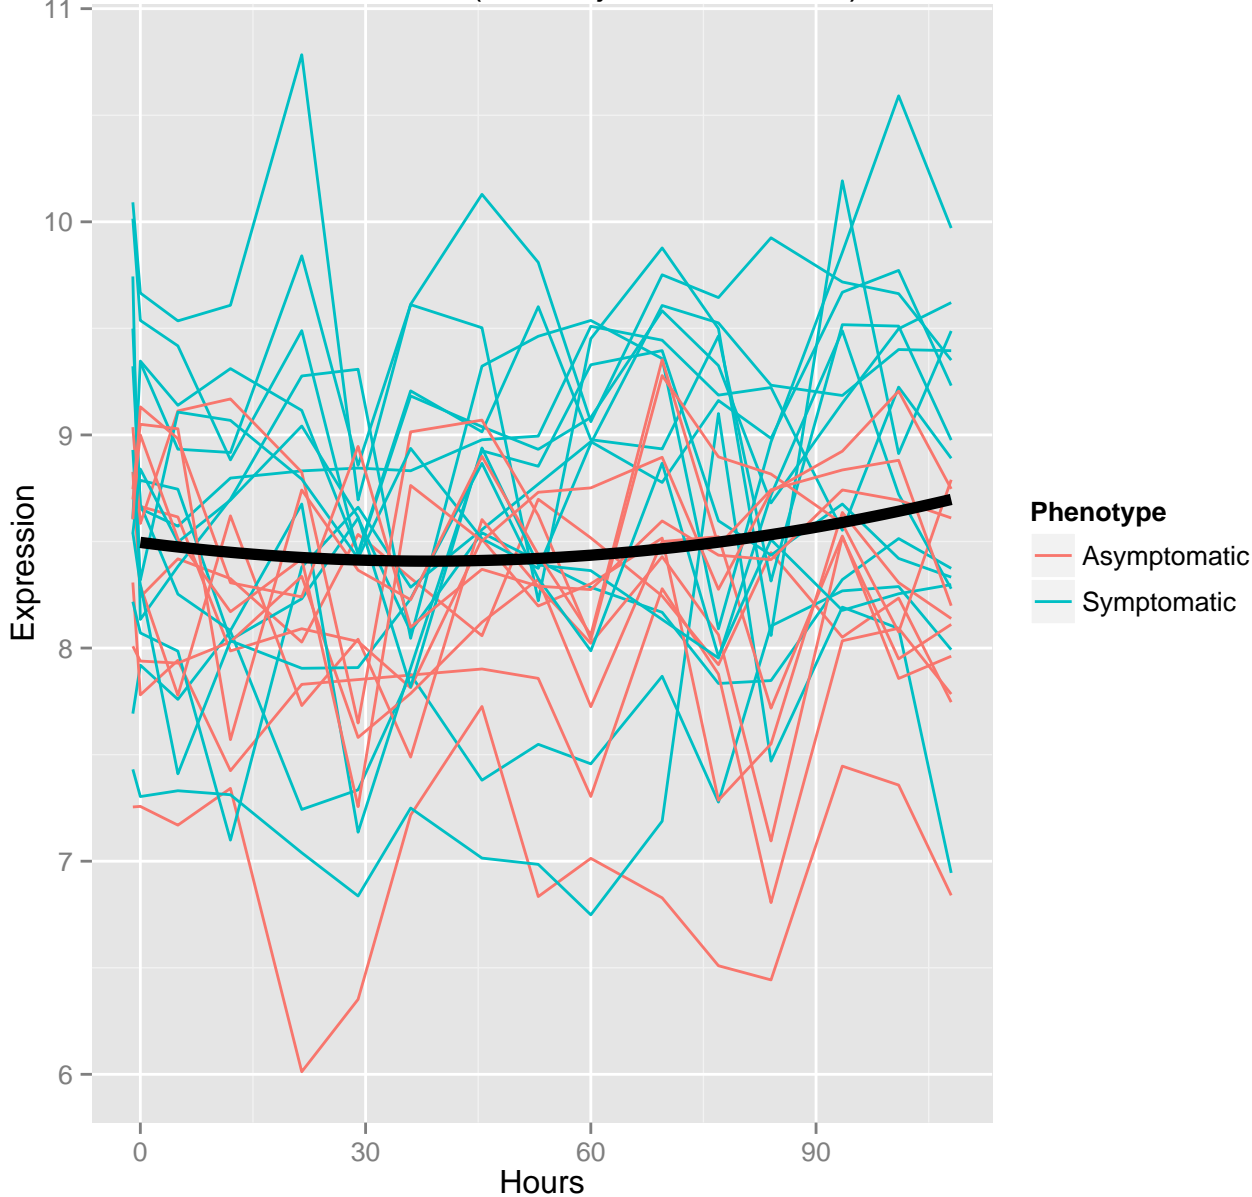

H1N1 : 207156\_at

P-Value for Mixed Model (null vs just timecourse): 0.0002471

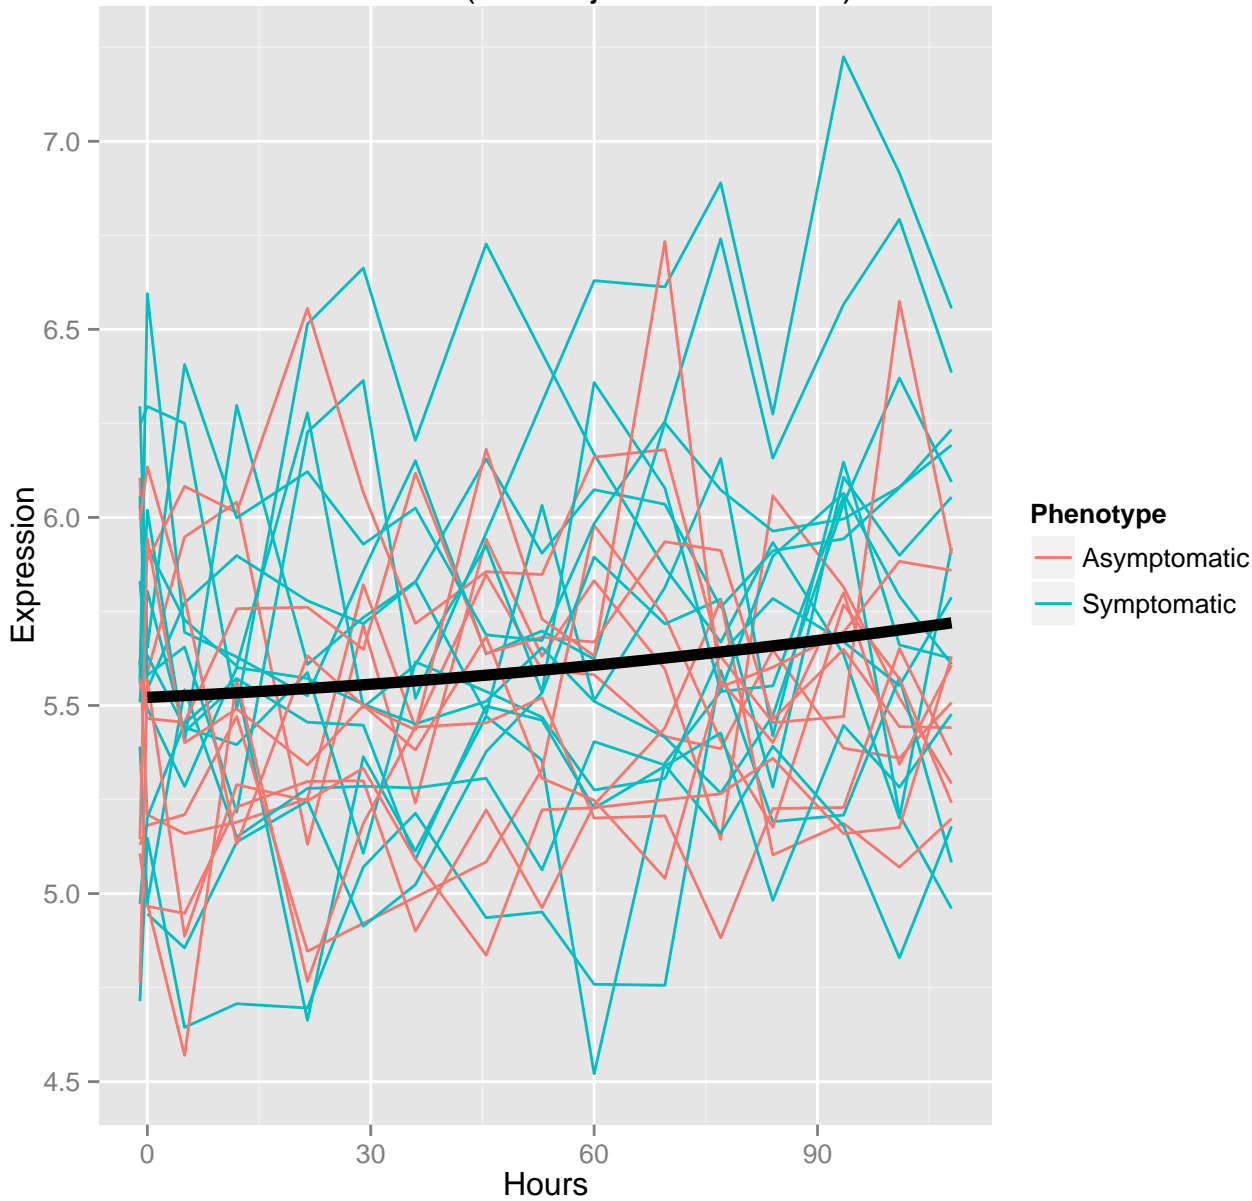

H1N1 : 207206\_s\_at

P-Value for Mixed Model (null vs just timecourse):  $2.74e-06$

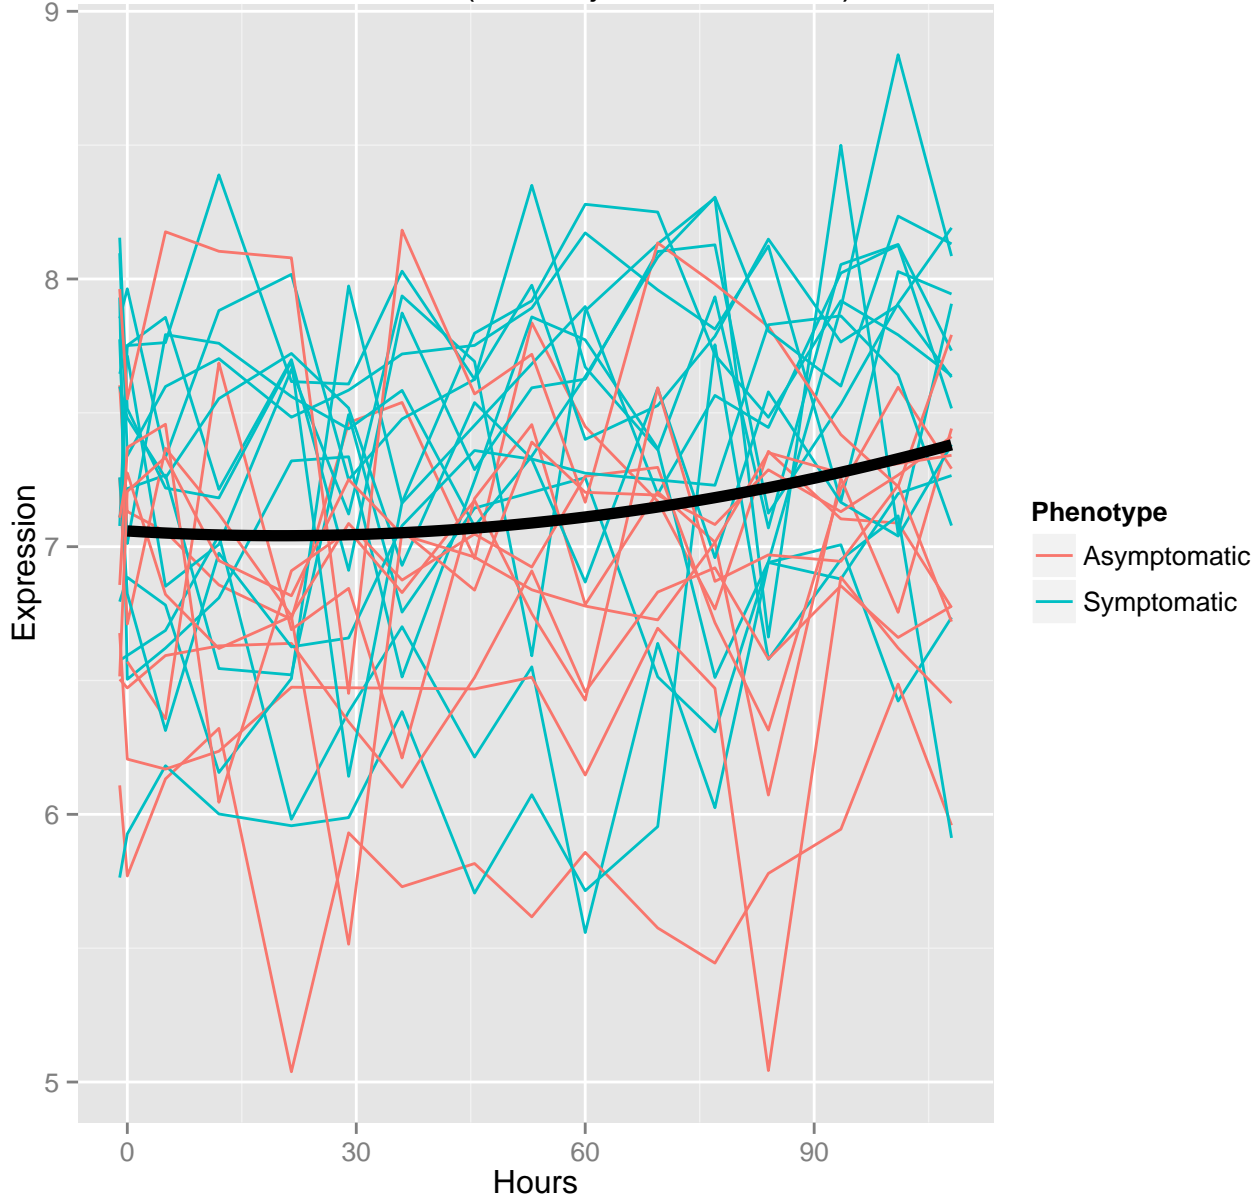

H1N1 : 207414\_s\_at

P-Value for Mixed Model (null vs just timecourse): 0.009527

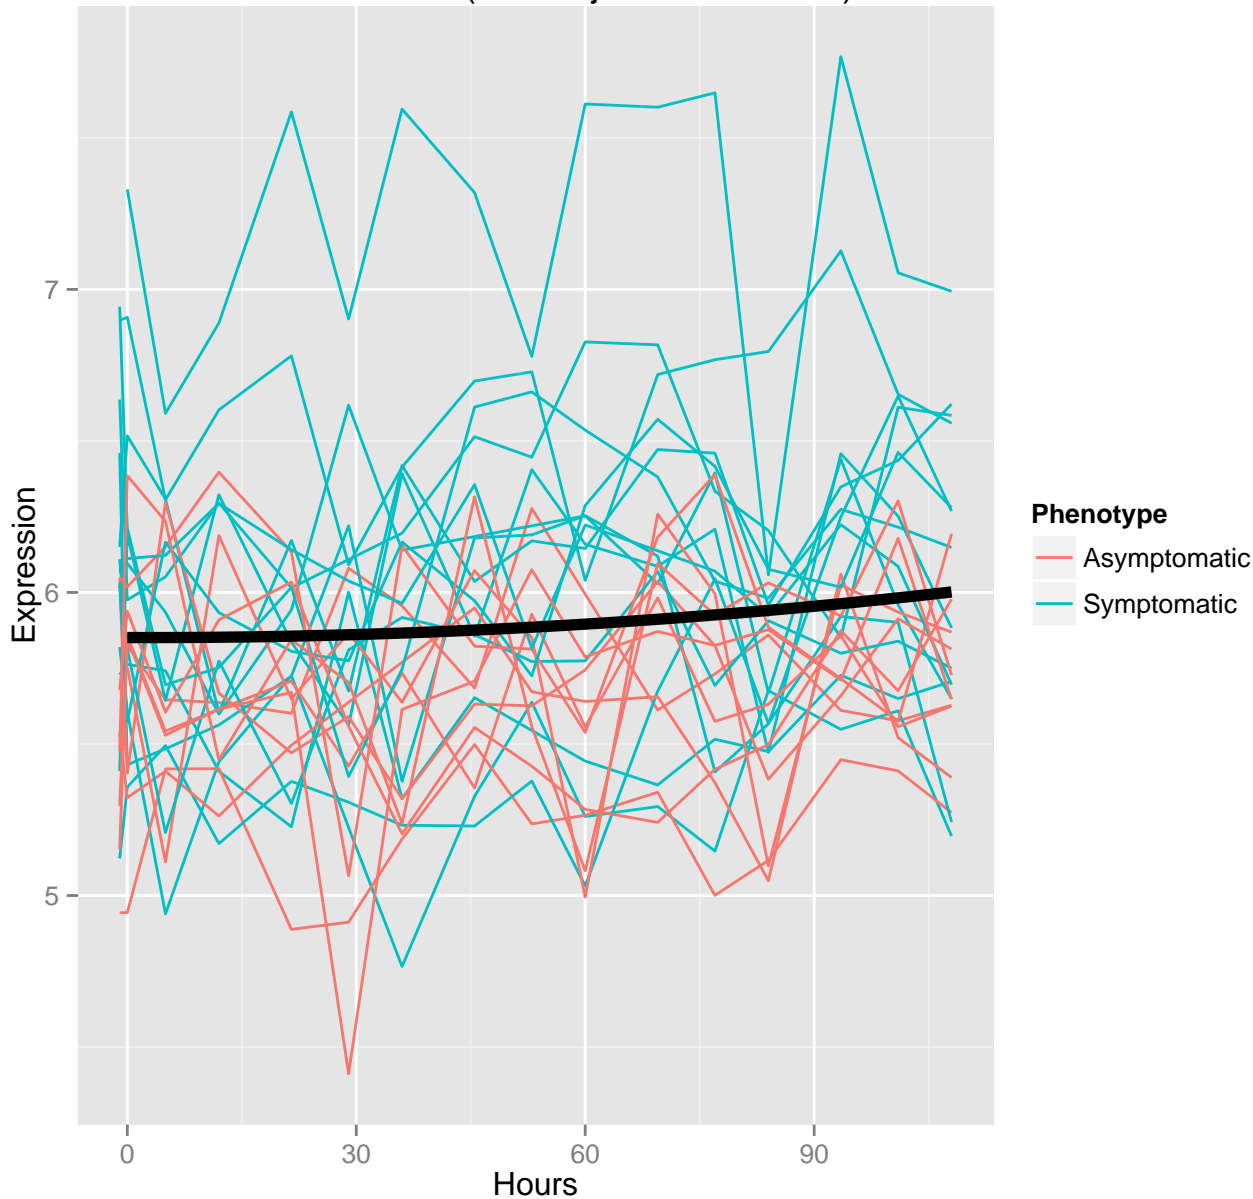

H1N1 : 207815\_at

P-Value for Mixed Model (null vs just timecourse): 0.007389

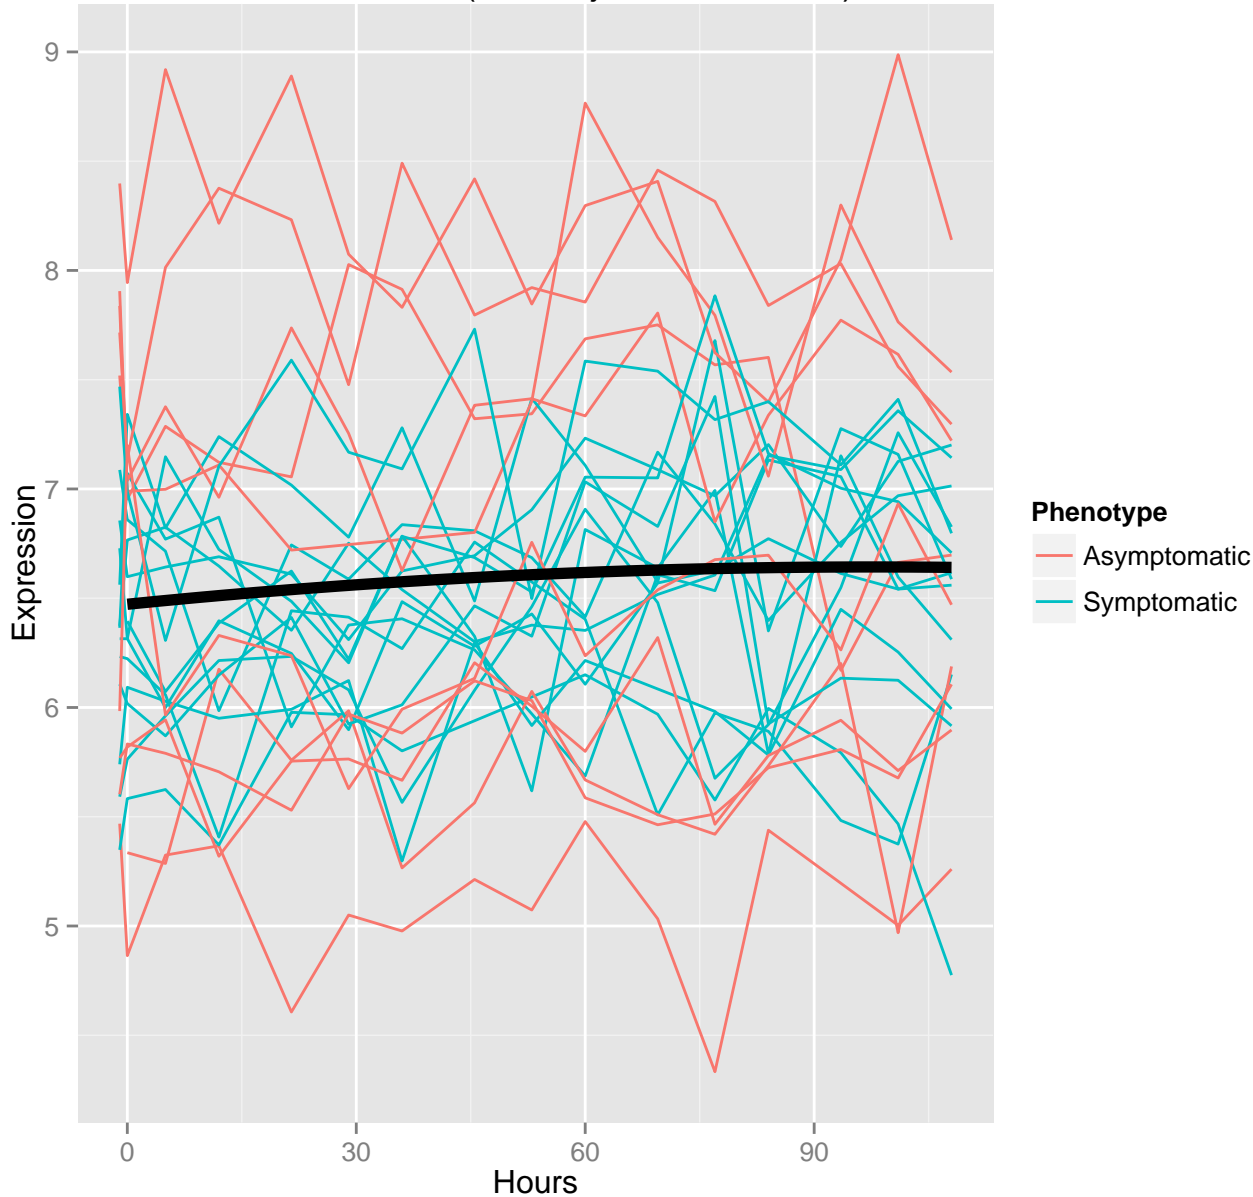

H1N1 : 208601\_s\_at

P-Value for Mixed Model (null vs just timecourse): 0.0005286

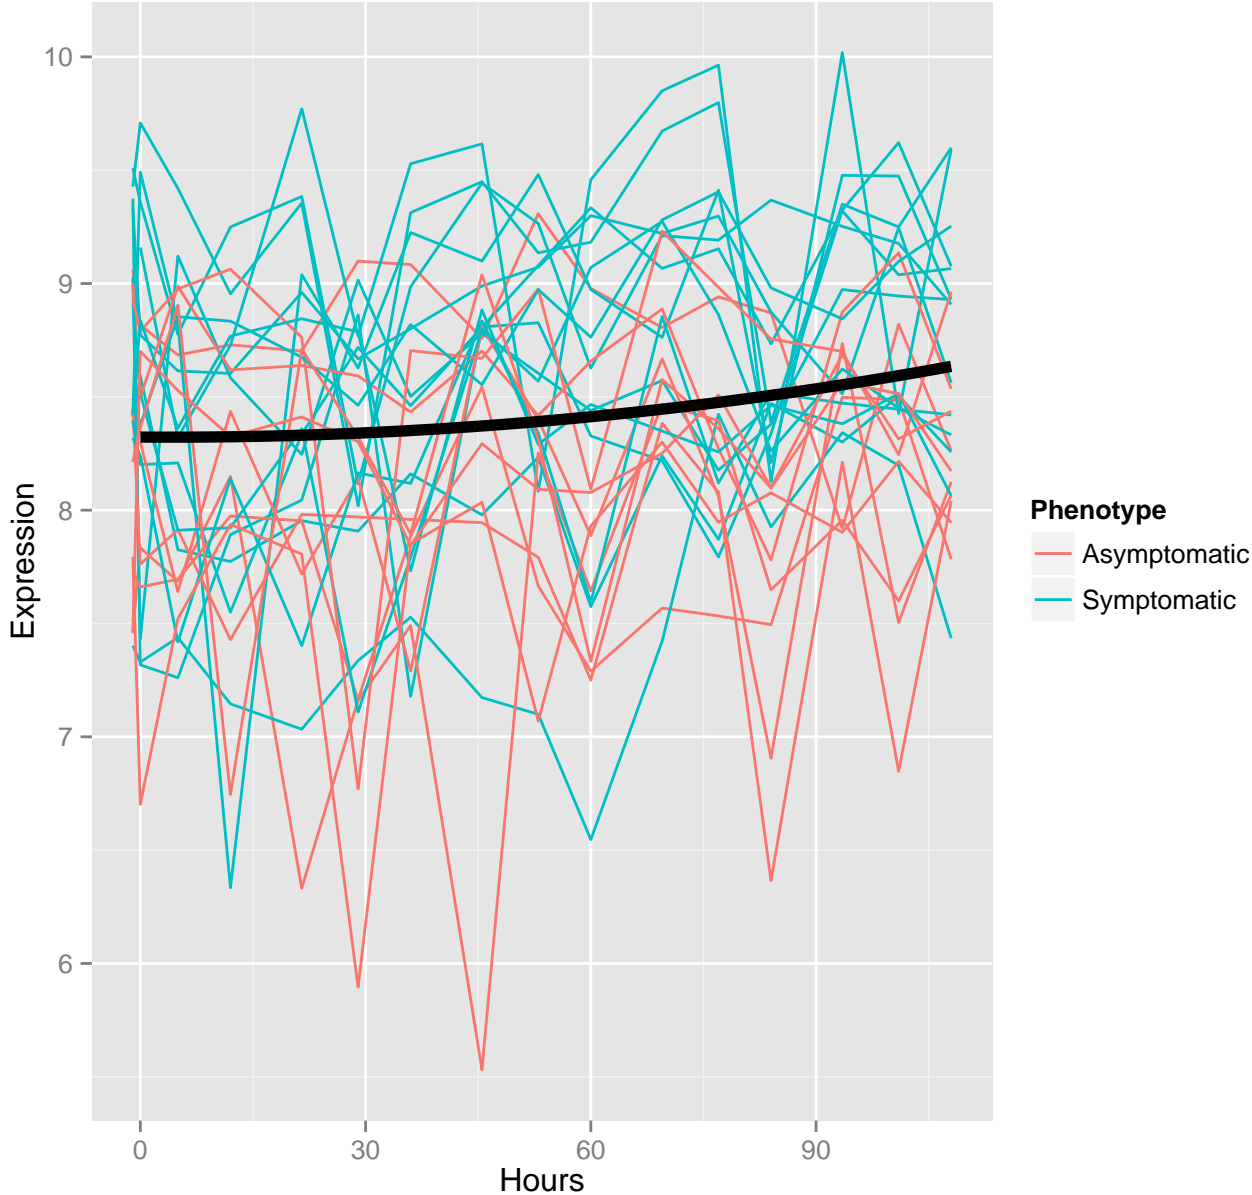

H1N1 : 208782\_at  
P-Value for Mixed Model (null vs just timecourse): 0.02008

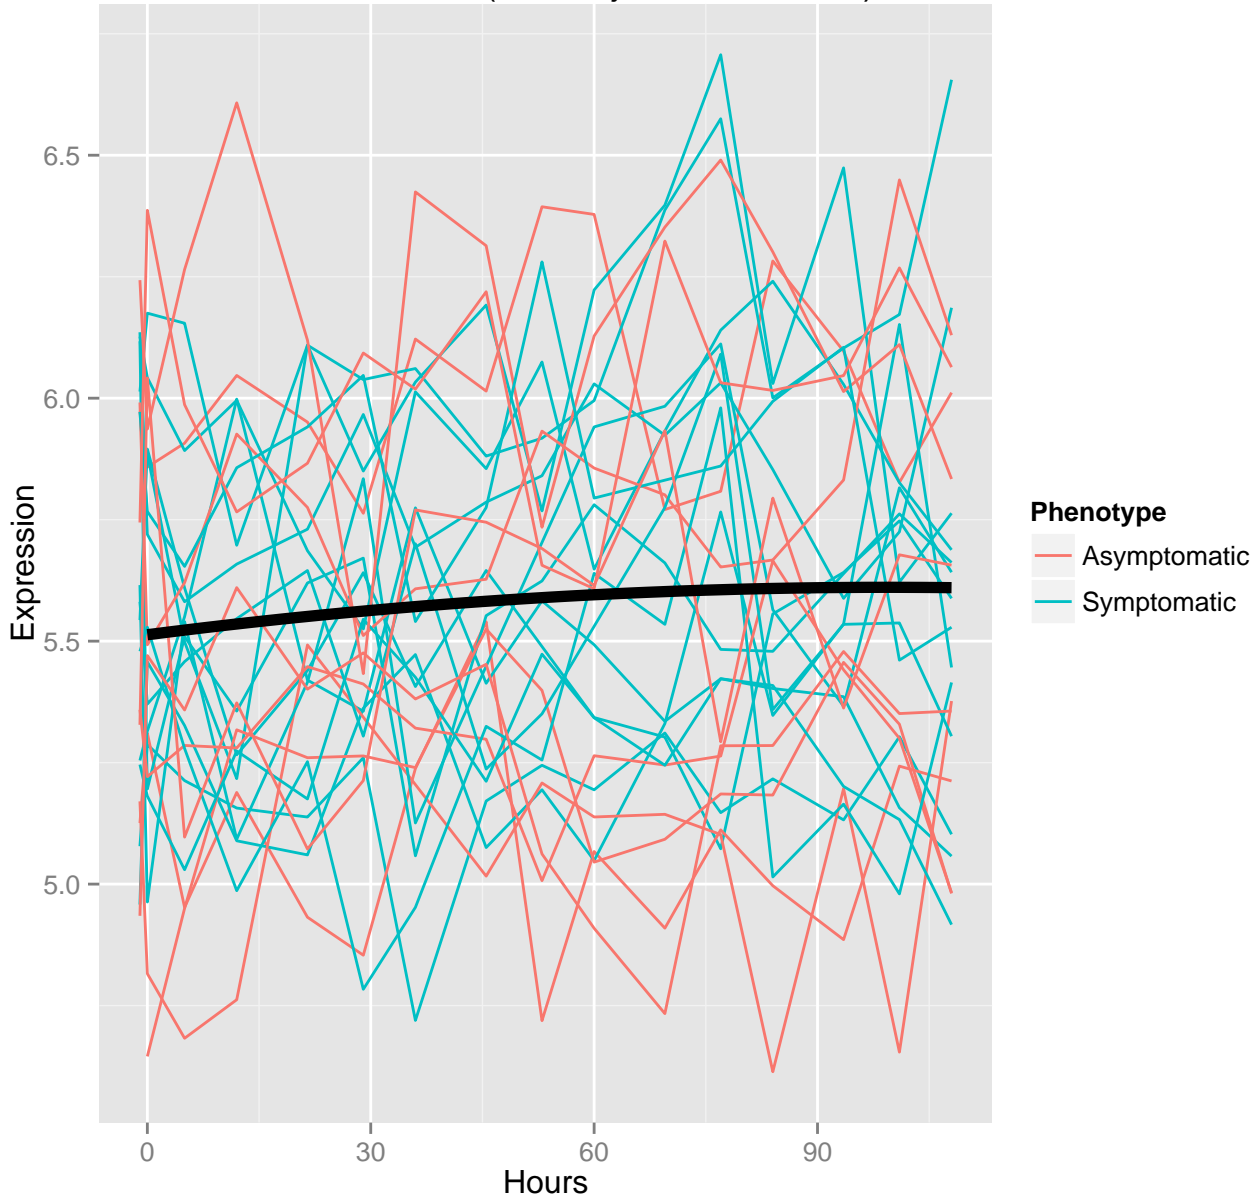



H1N1 : 208791\_at

P-Value for Mixed Model (null vs just timecourse): 0.001284

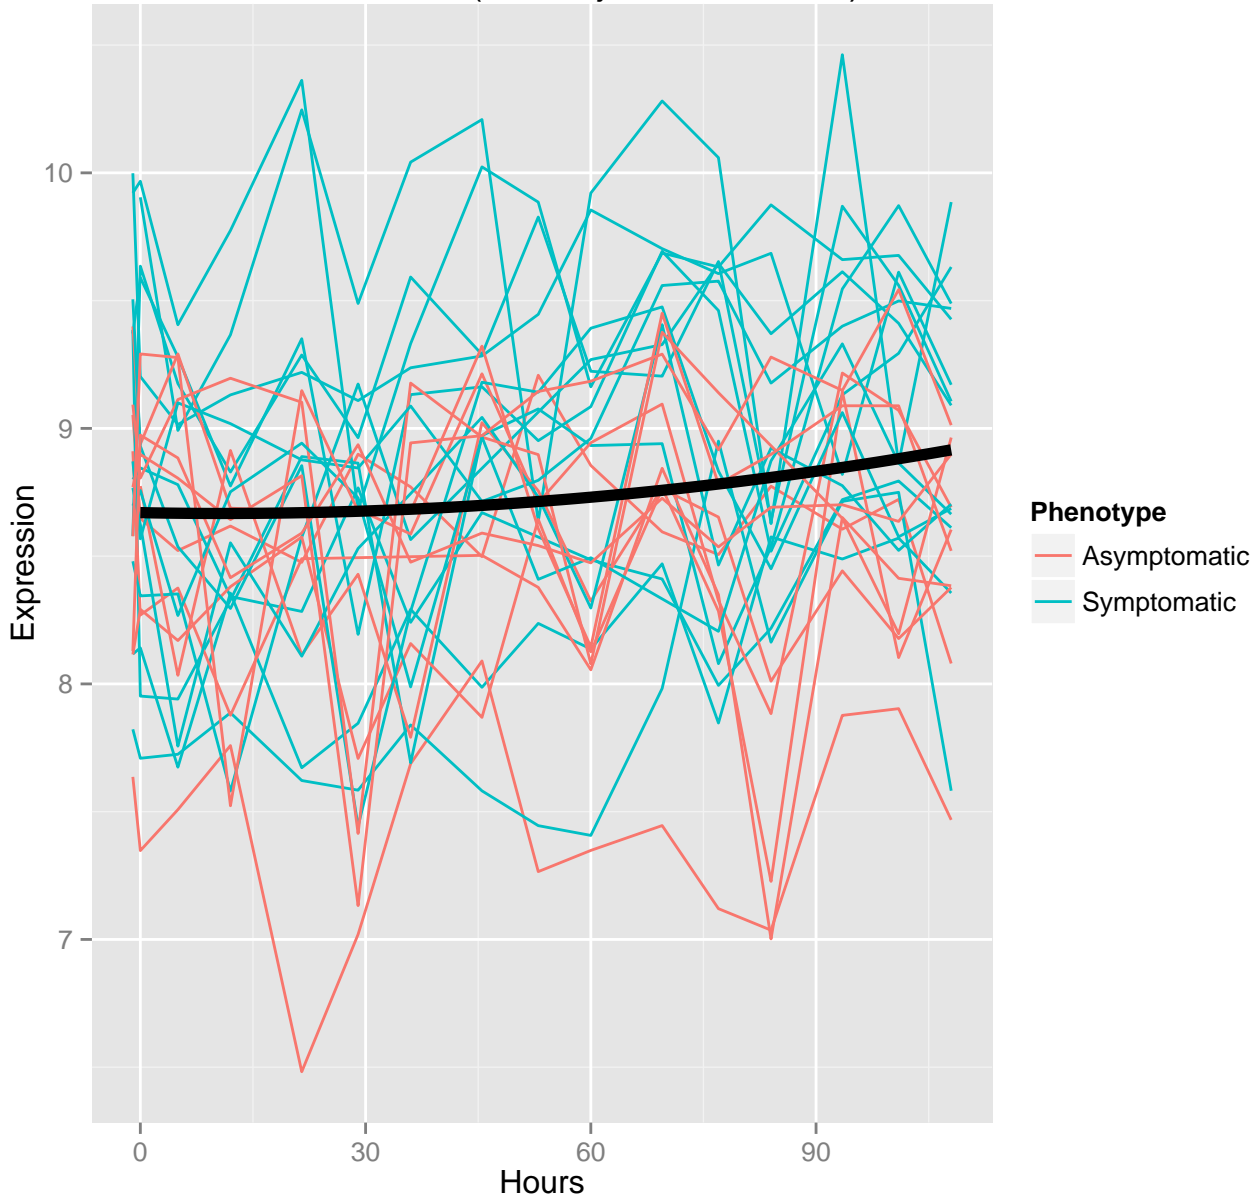

H1N1 : 208792\_s\_at

P-Value for Mixed Model (null vs just timecourse):  $5.519e-05$

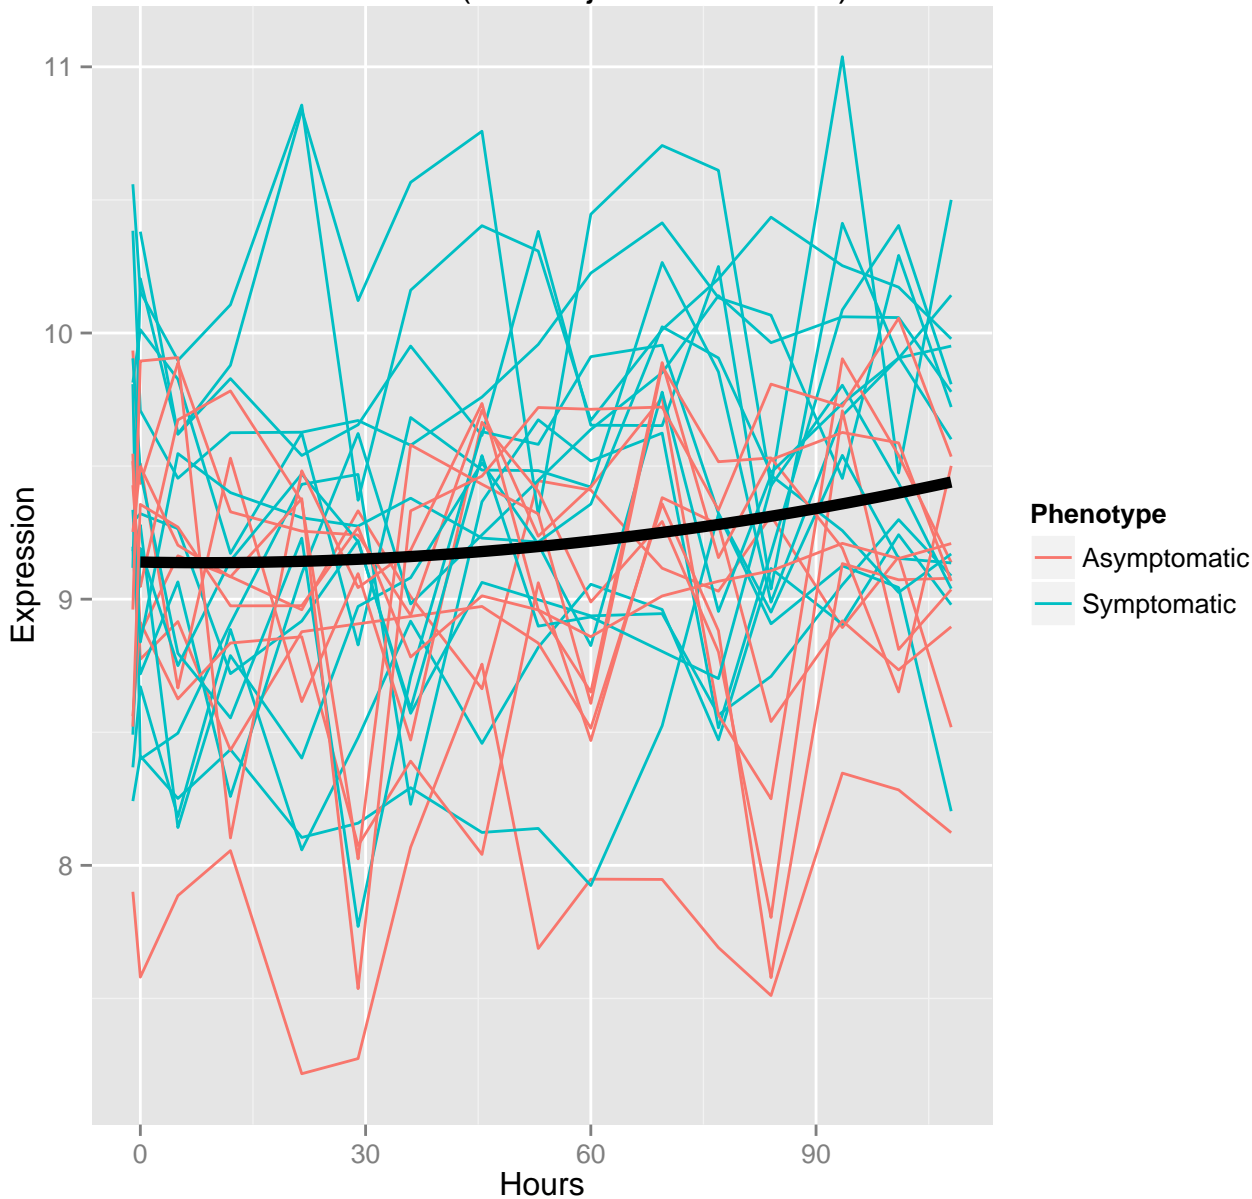

H1N1 : 209651\_at

P-Value for Mixed Model (null vs just timecourse): 0.03777

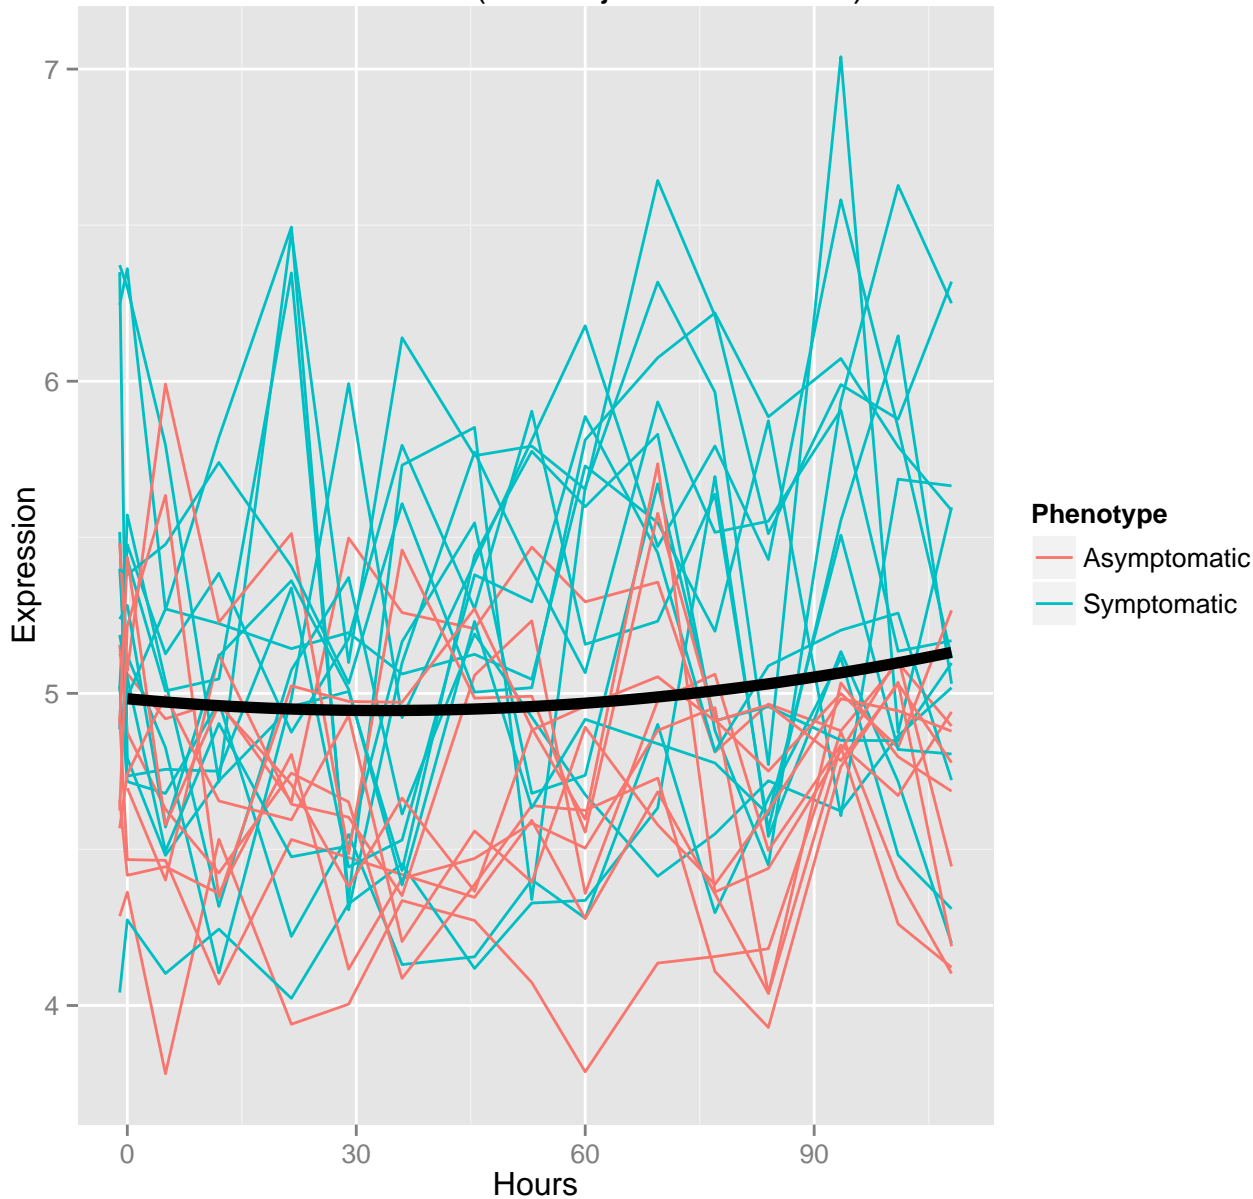

H1N1 : 210387\_at

P-Value for Mixed Model (null vs just timecourse): 0.0003044

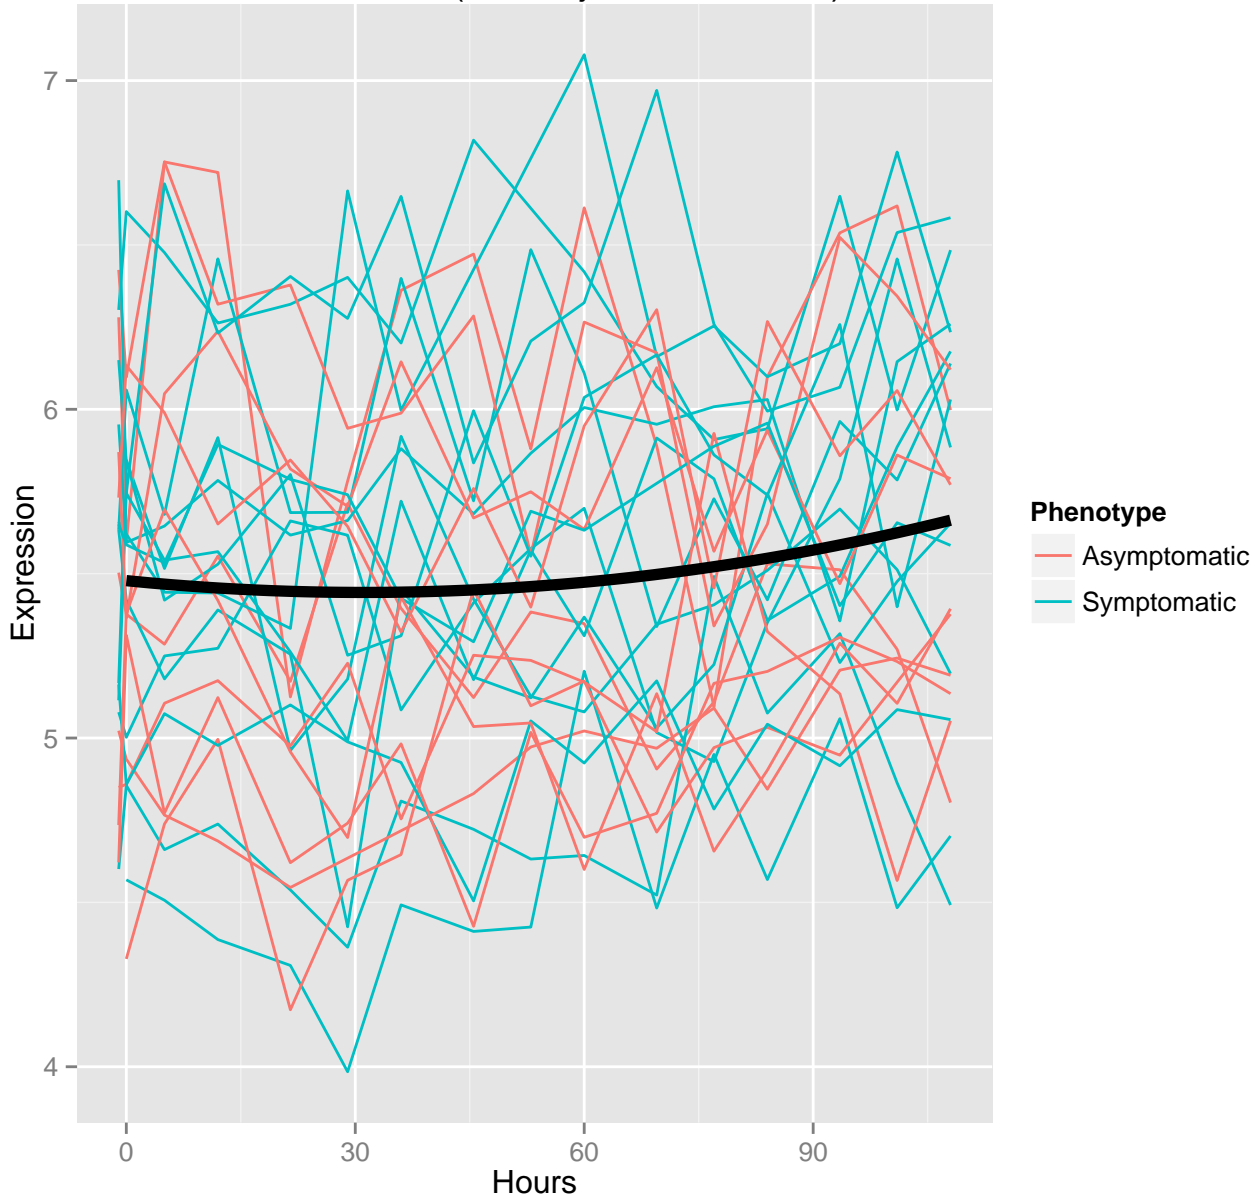

H1N1 : 210986\_s\_at

P-Value for Mixed Model (null vs just timecourse): 0.0001365

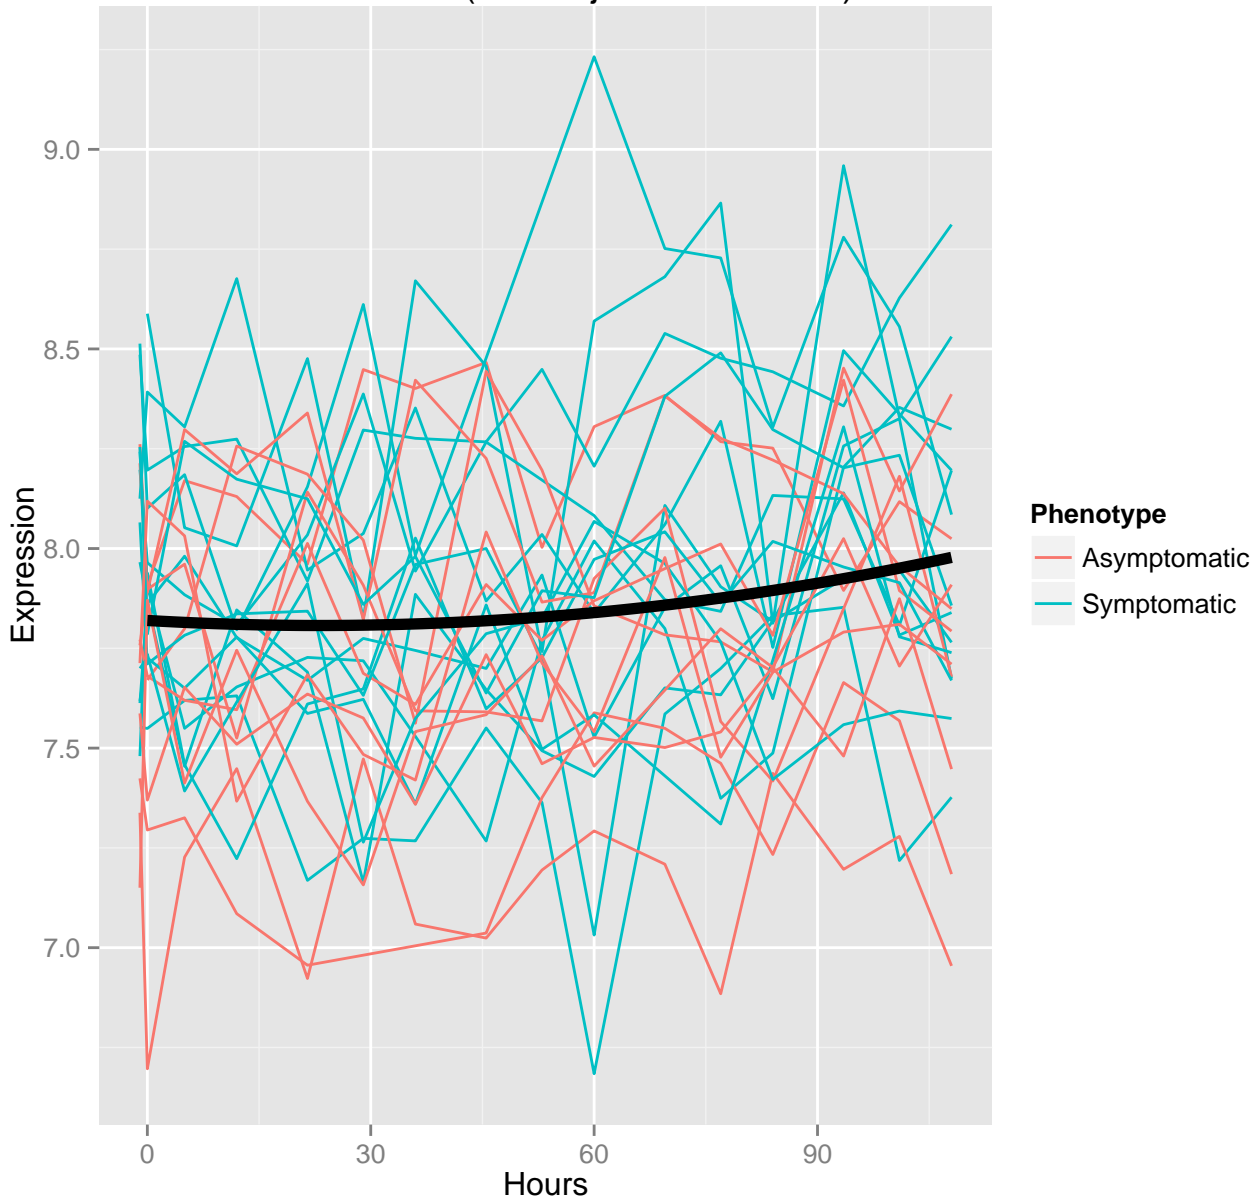

H1N1 : 211026\_s\_at

P-Value for Mixed Model (null vs just timecourse):  $8.351e-05$

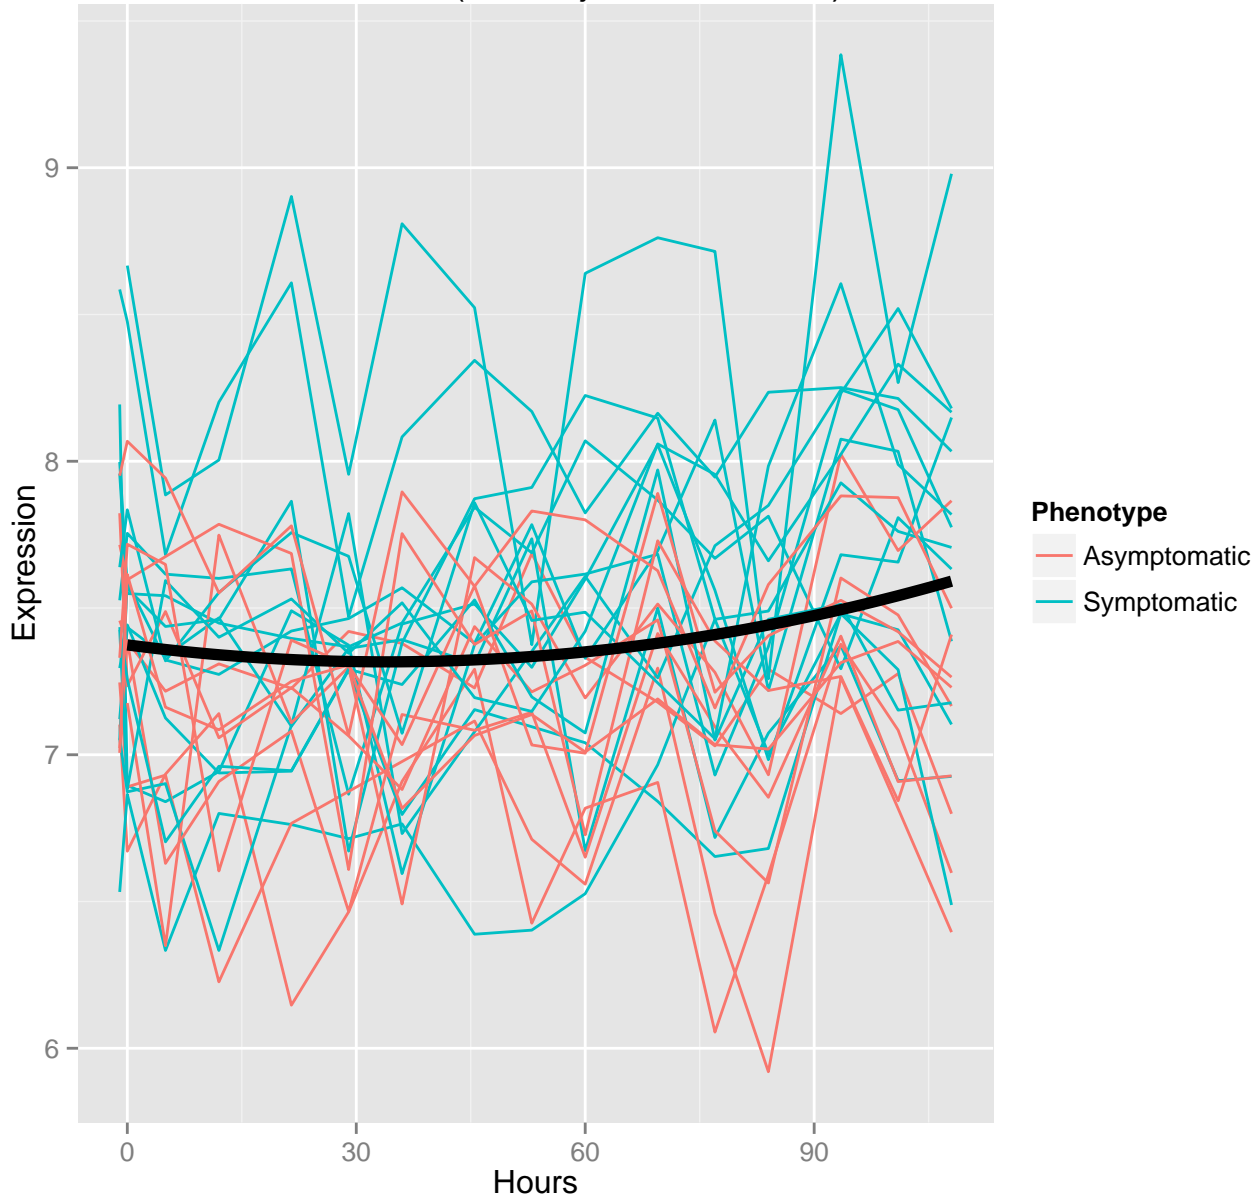

H1N1 : 212077\_at  
P-Value for Mixed Model (null vs just timecourse): 0.04077

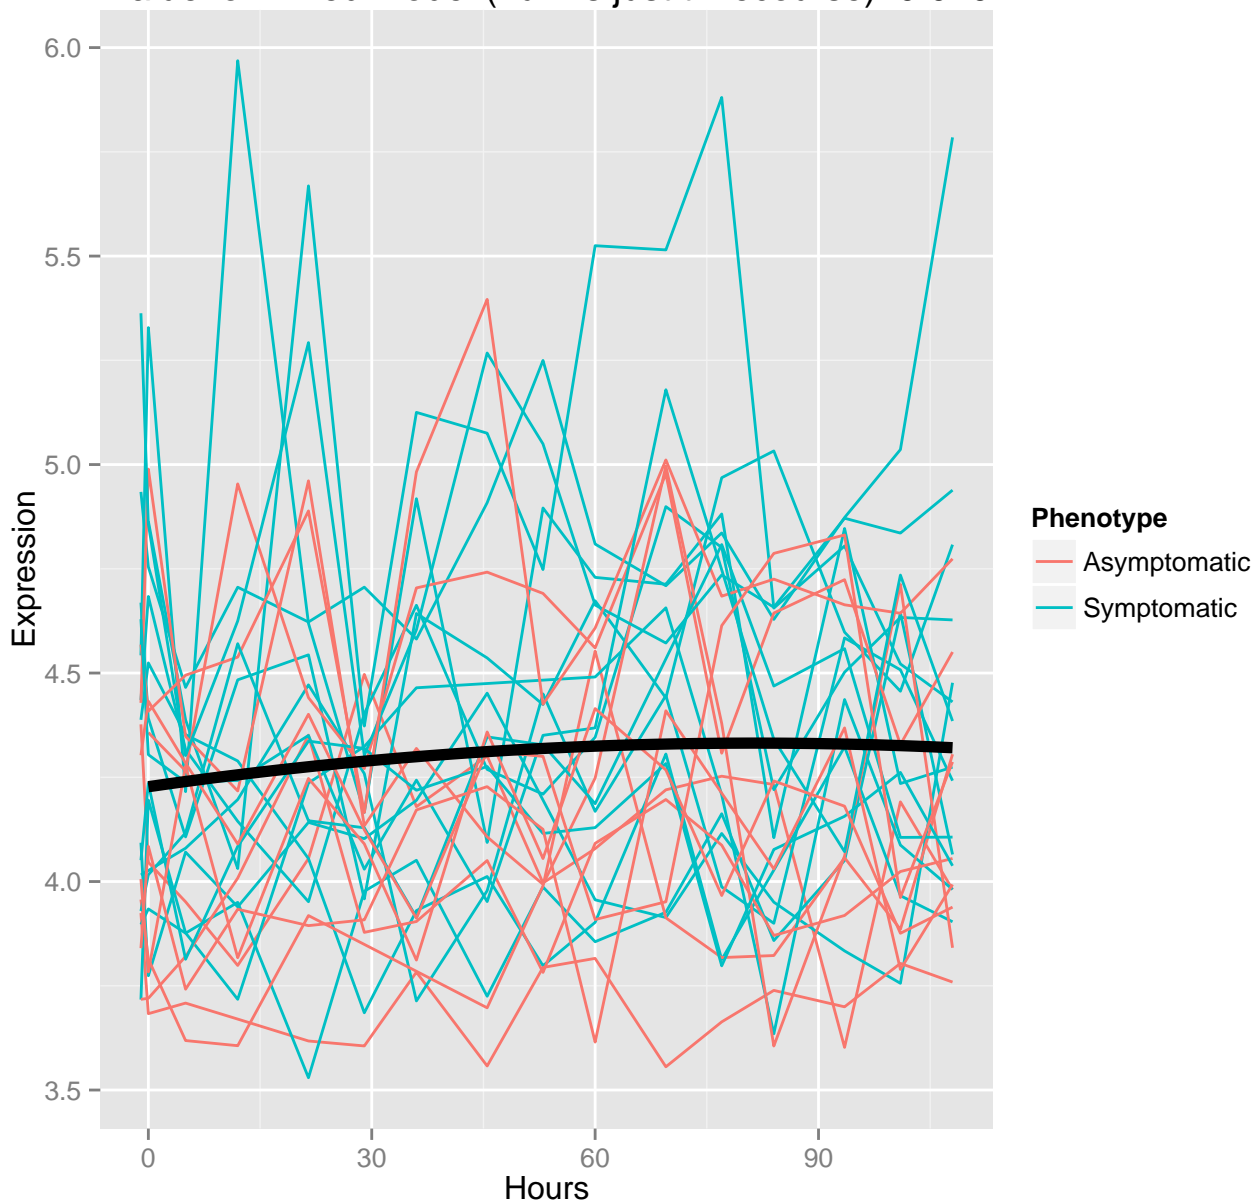

H1N1 : 212148\_at

P-Value for Mixed Model (null vs just timecourse): 0.0001209

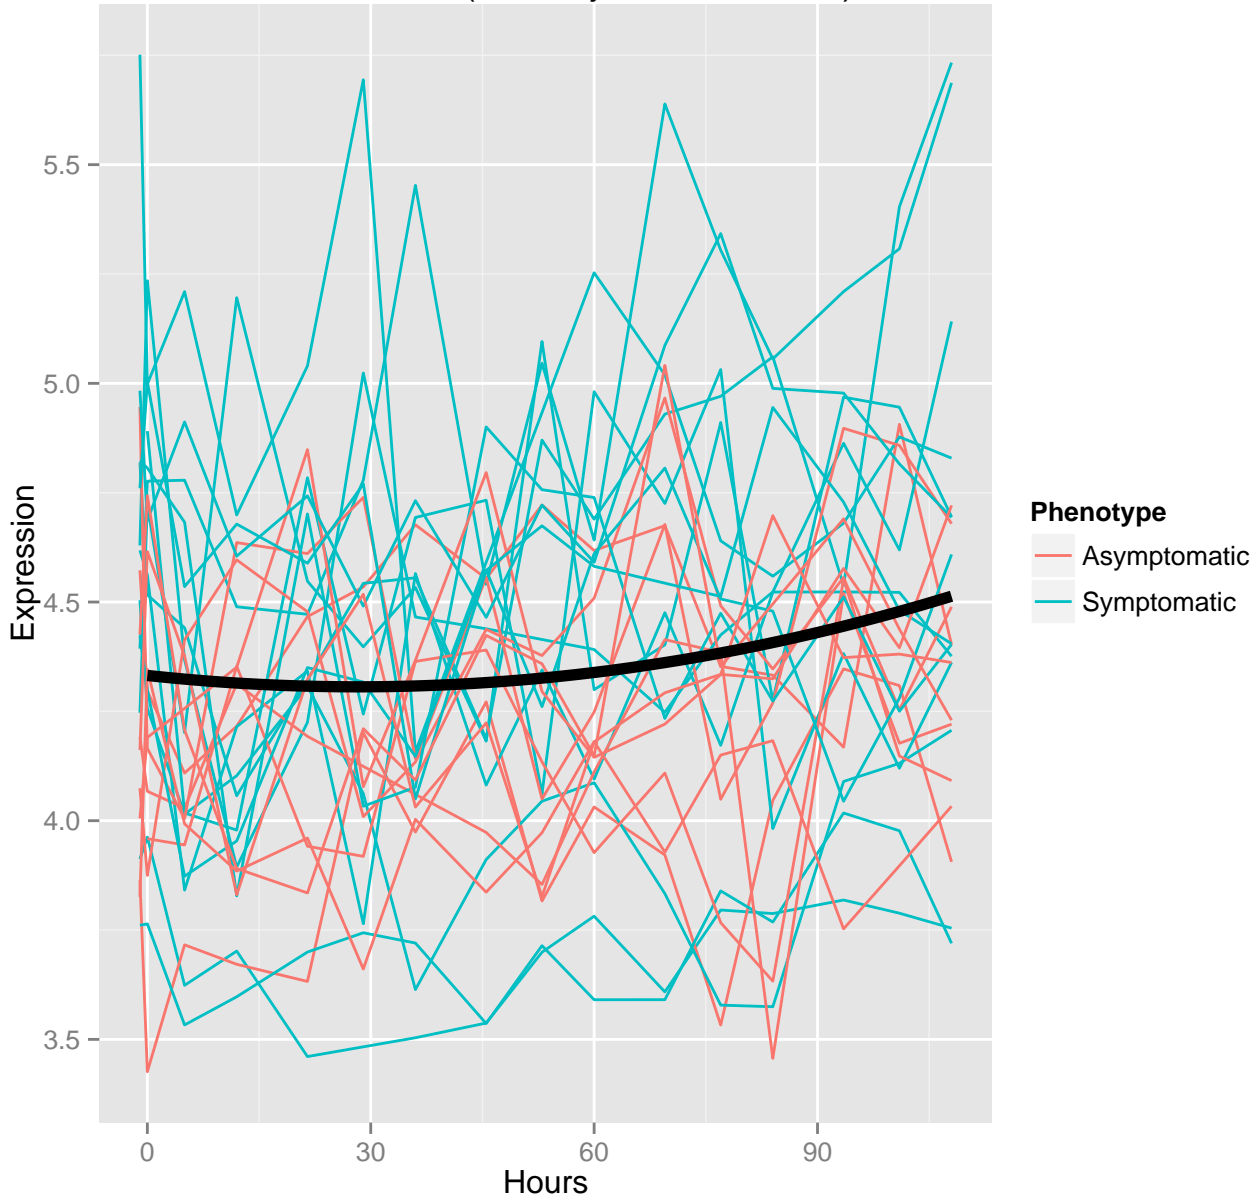



H1N1 : 212151\_at

P-Value for Mixed Model (null vs just timecourse): 0.0001002

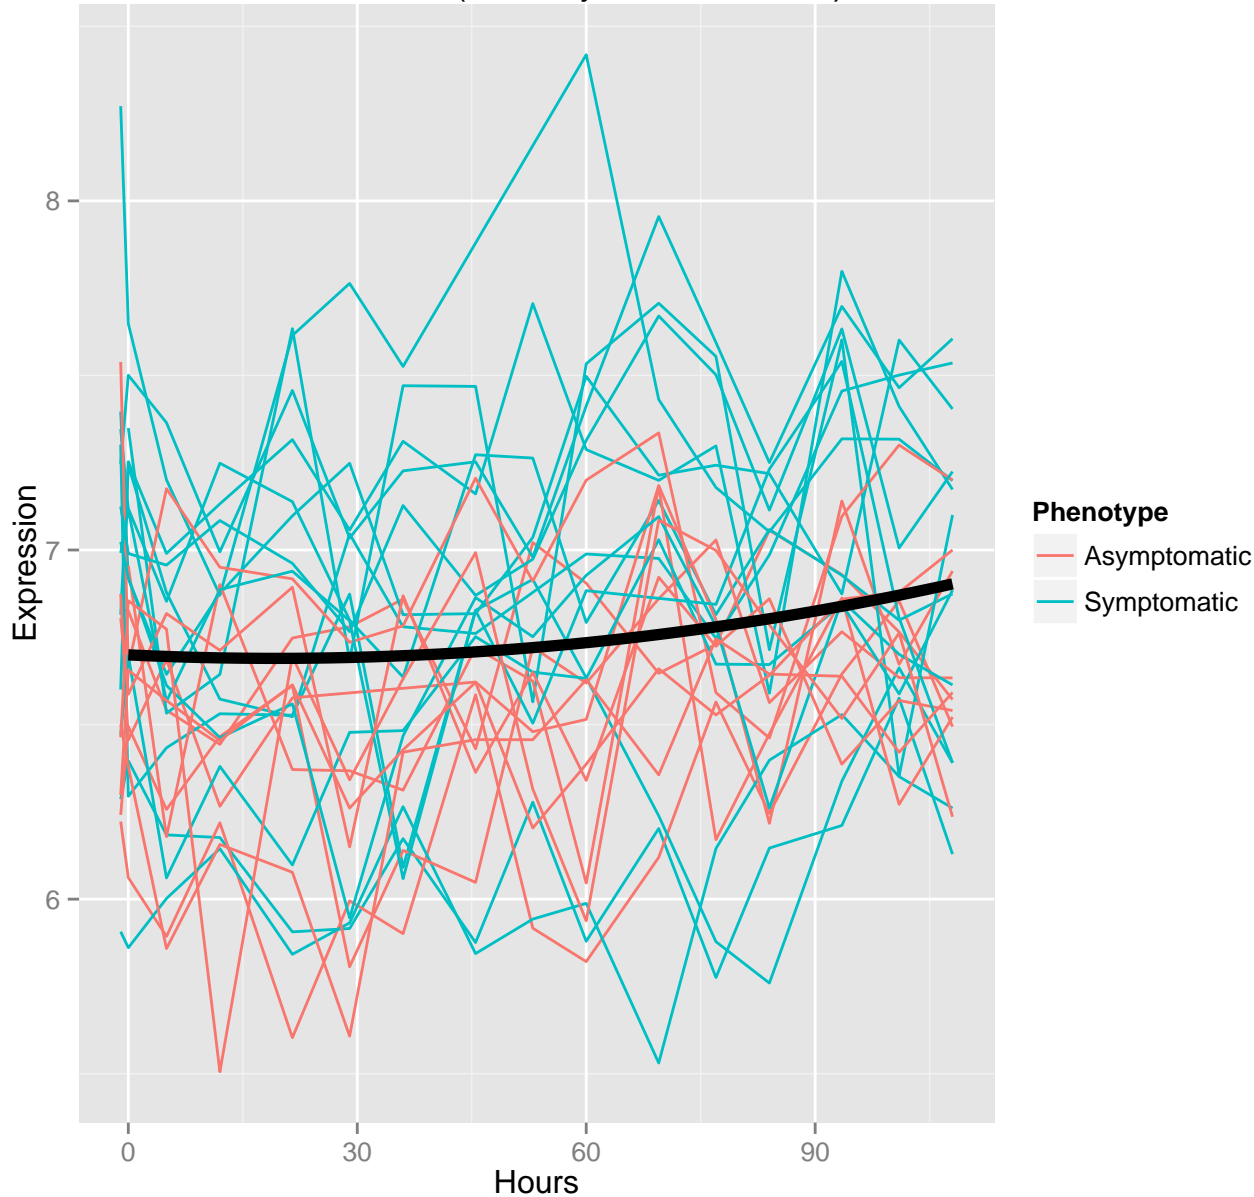

H1N1 : 212573\_at

P-Value for Mixed Model (null vs just timecourse):  $8.307e-13$

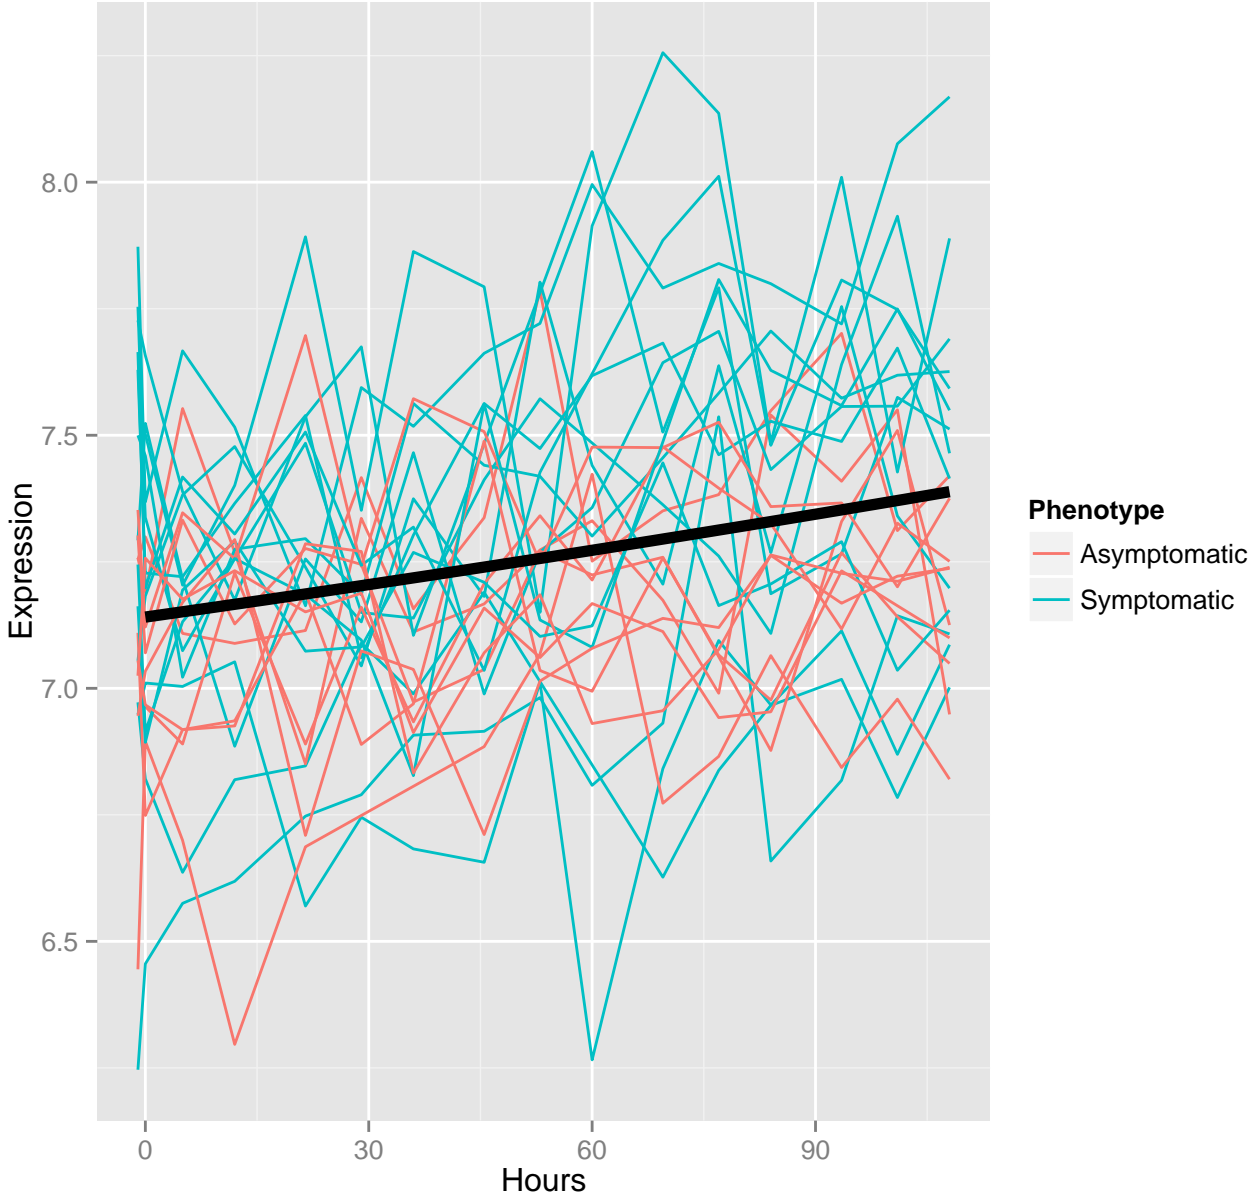

H1N1 : 212651\_at

P-Value for Mixed Model (null vs just timecourse):  $1.233e-06$

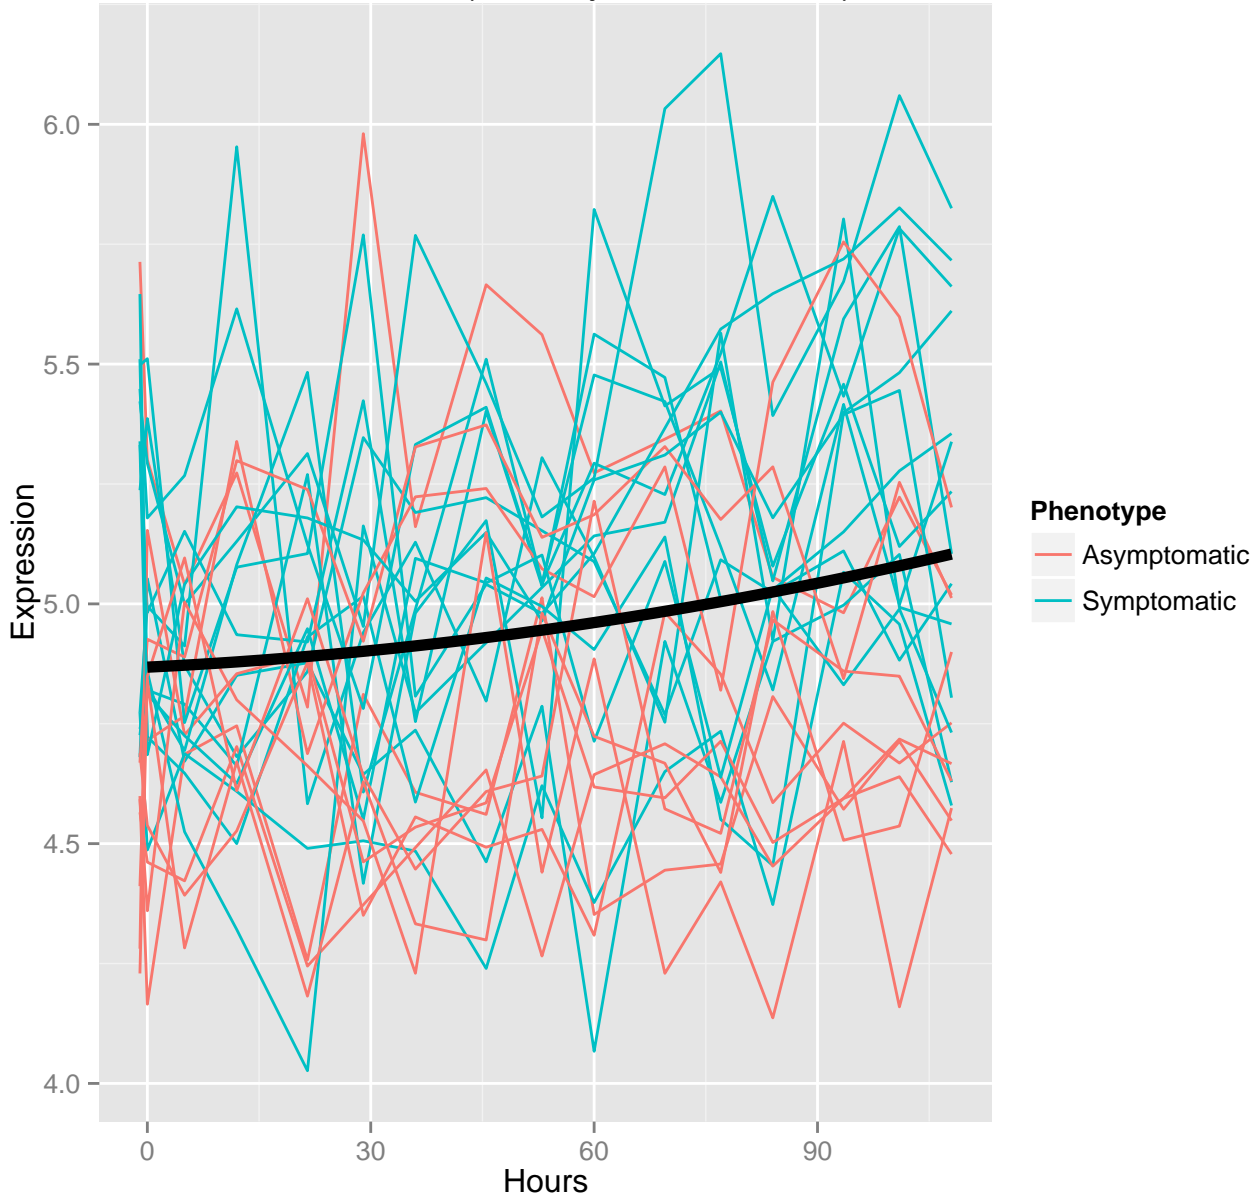

H1N1 : 214146\_s\_at

P-Value for Mixed Model (null vs just timecourse):  $1.162e-10$

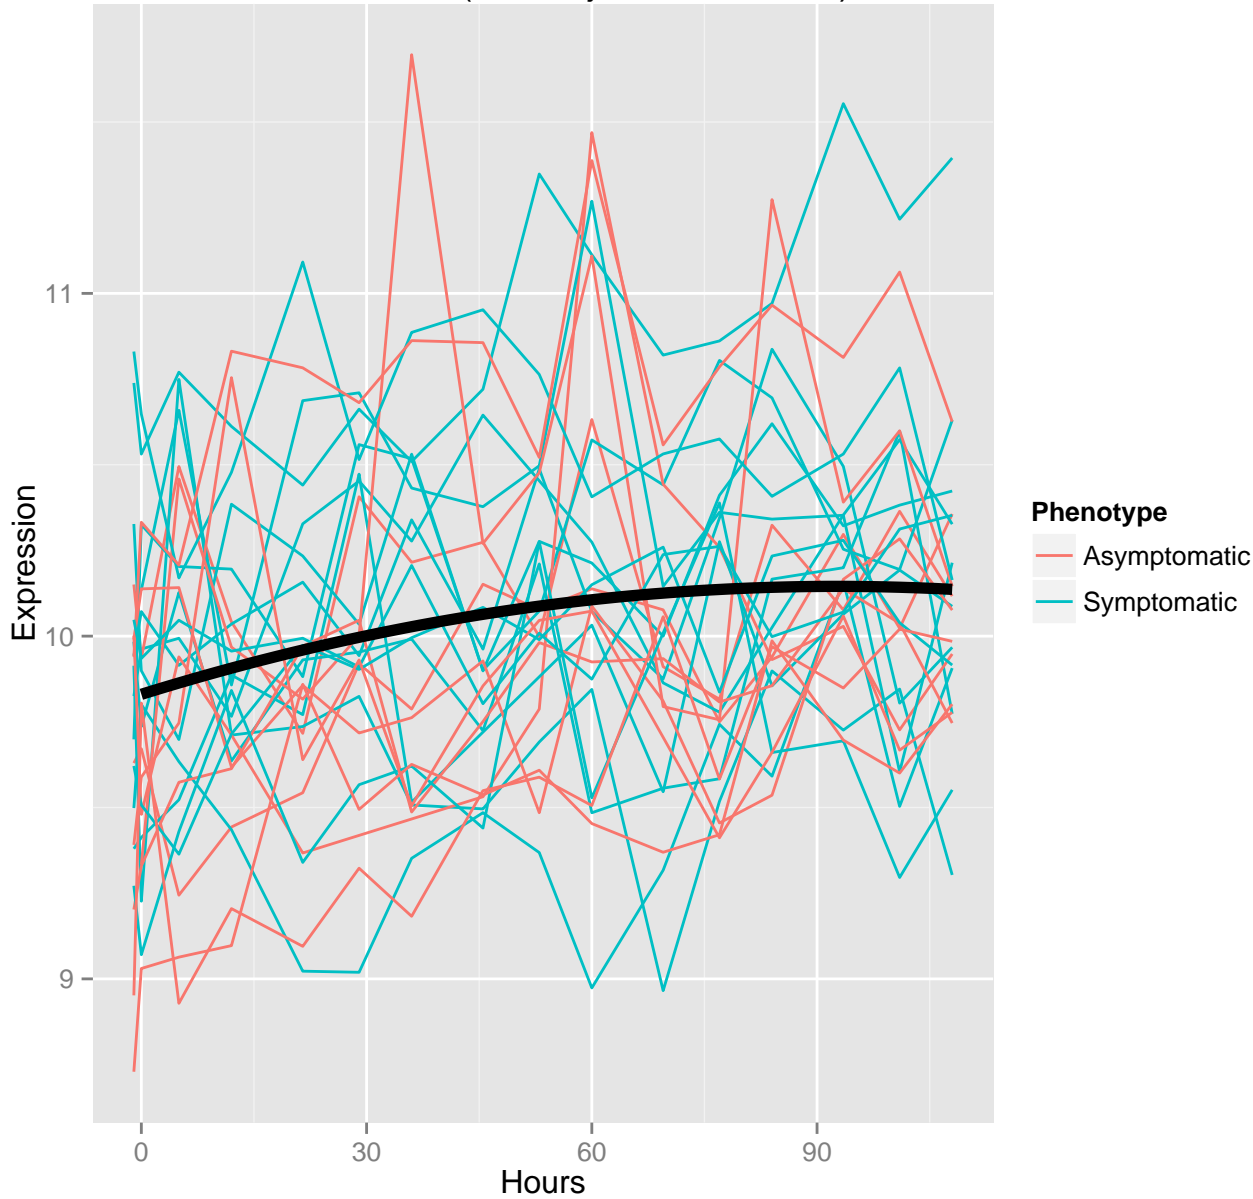

H1N1 : 214974\_x\_at

P-Value for Mixed Model (null vs just timecourse): 0.01129

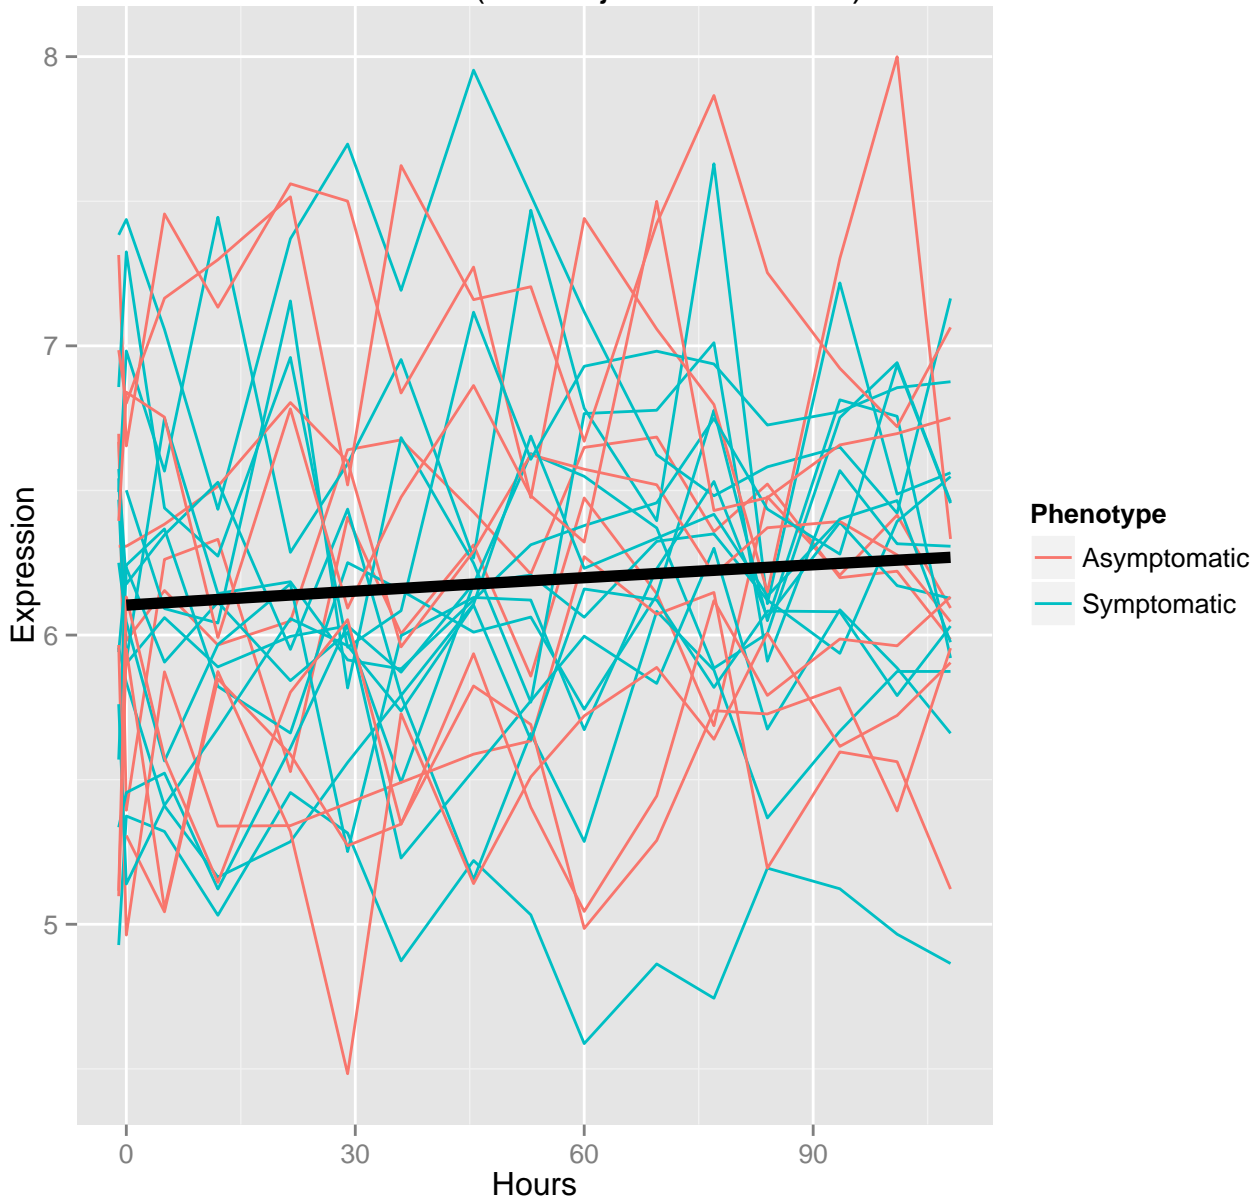

H1N1 : 215779\_s\_at

P-Value for Mixed Model (null vs just timecourse): 0.0001844

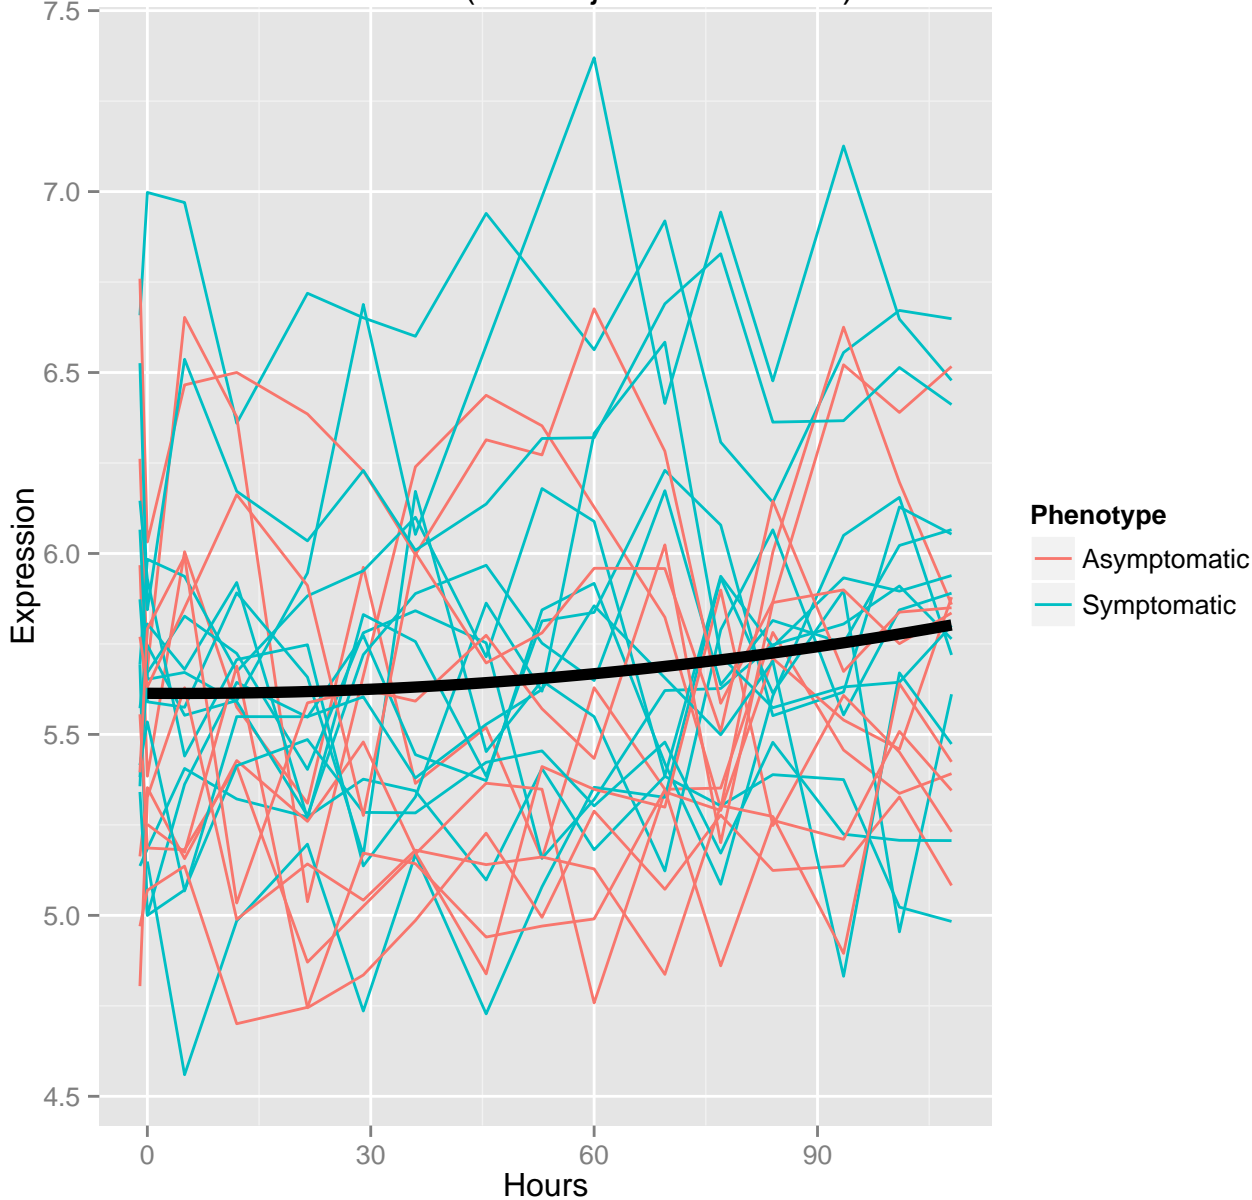

H1N1 : 216956\_s\_at

P-Value for Mixed Model (null vs just timecourse): 0.0002688

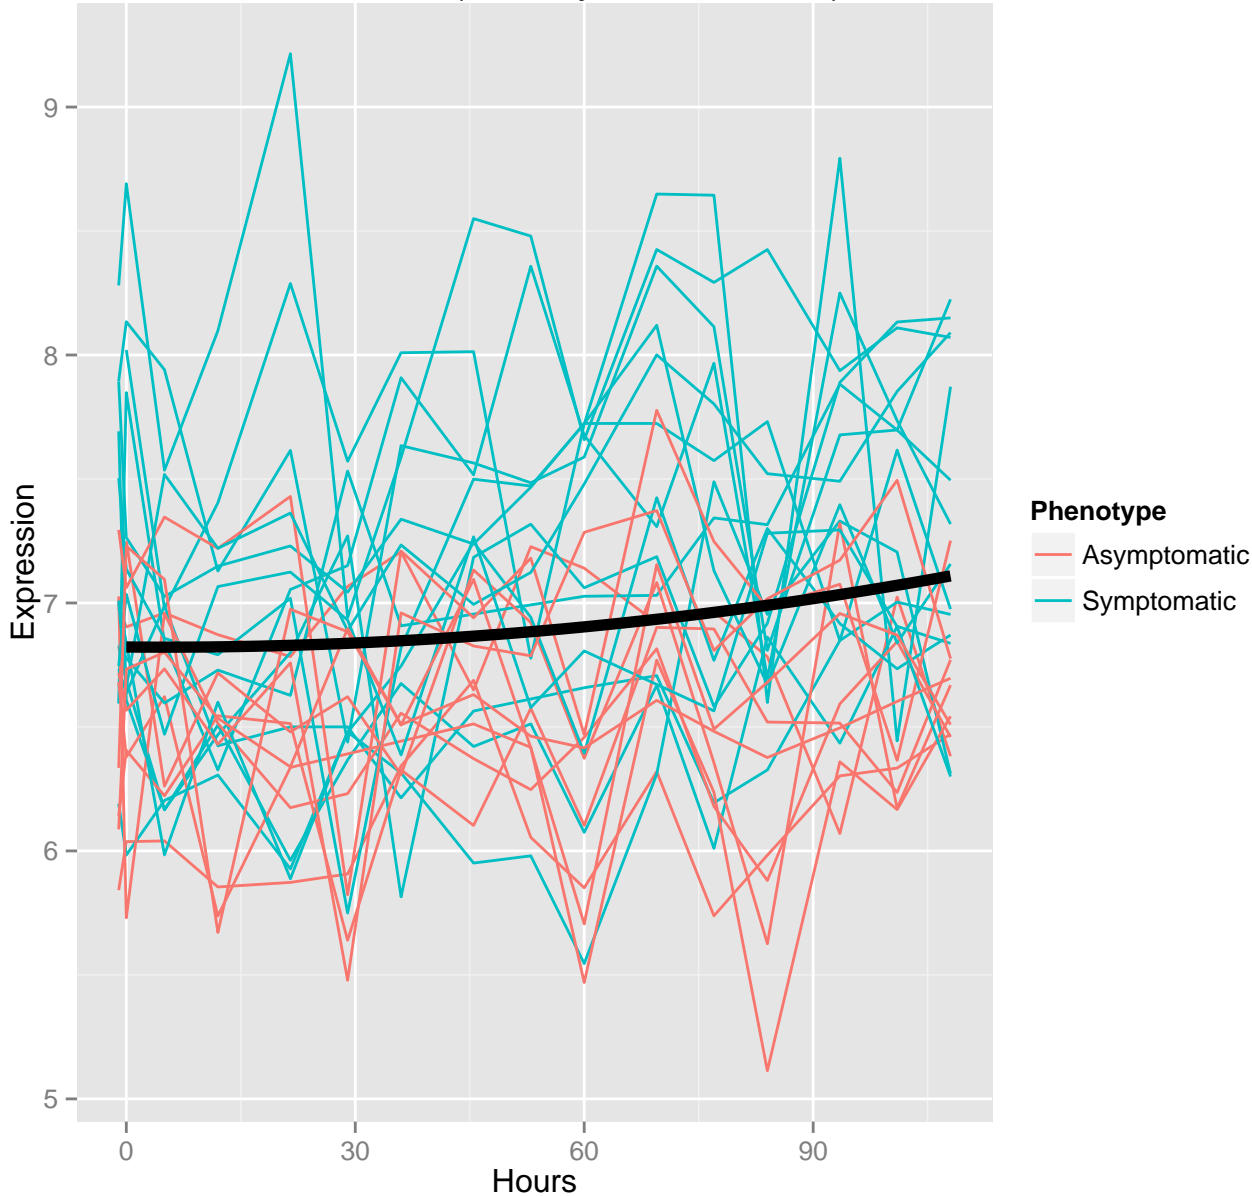

H1N1 : 220496\_at

P-Value for Mixed Model (null vs just timecourse): 1.109e-09

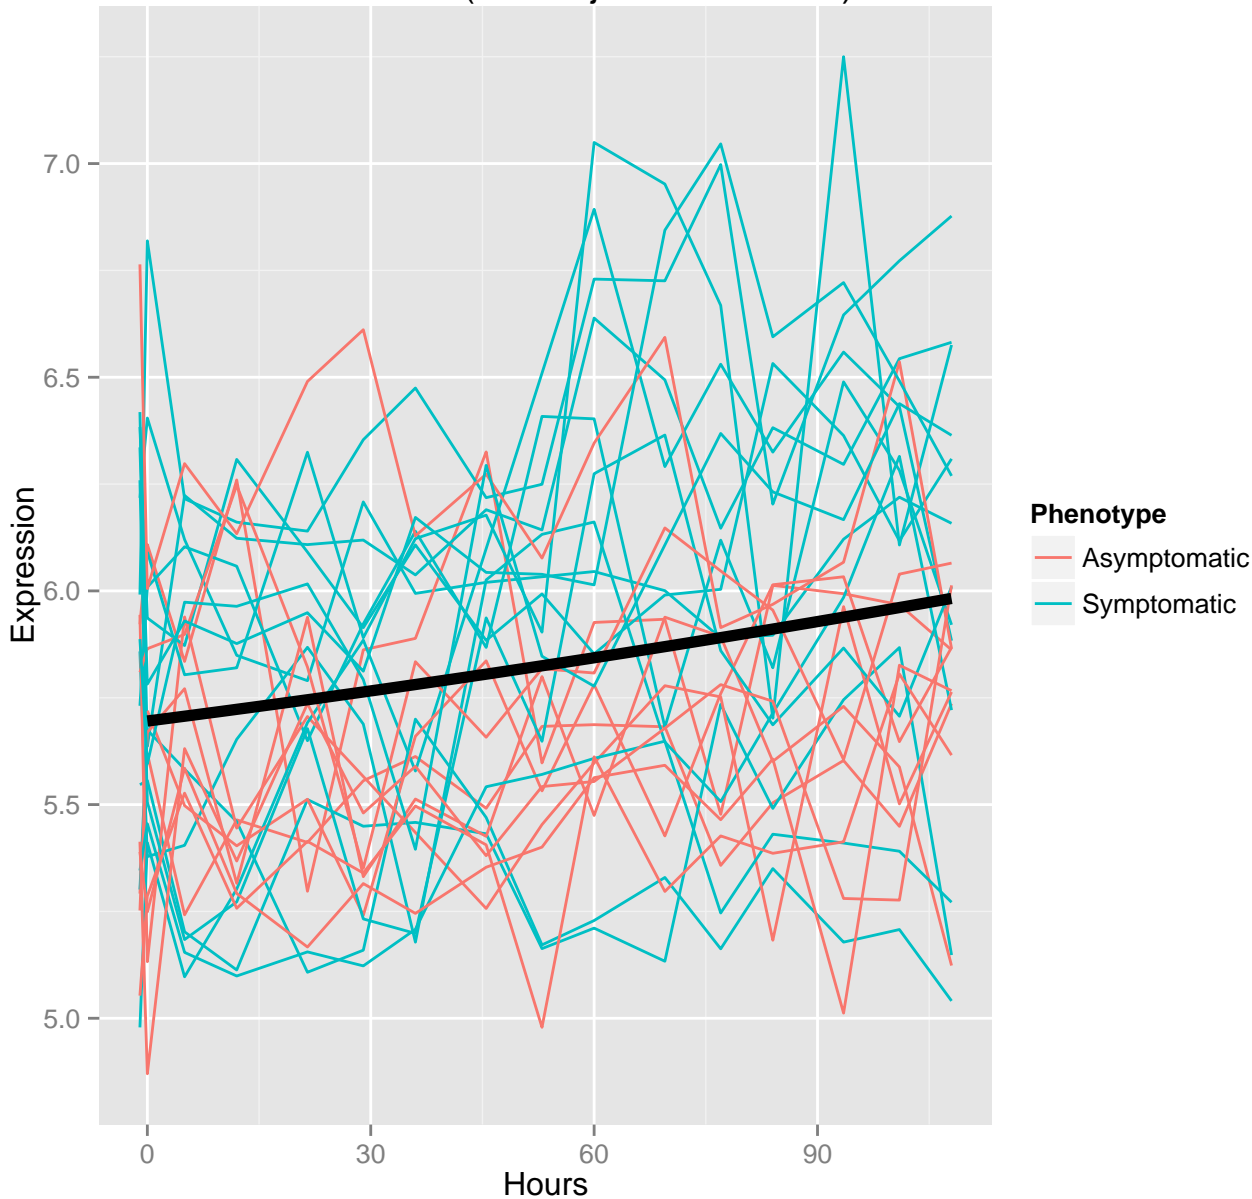

Supplement: pone.0132259.s001.pdf [file pone.0132259.s001.pdf]
