# Supplementary material for: Gene Expression Profiles Link Respiratory Viral Infection, Platelet Response to Aspirin, and Acute Myocardial Infarction
Source: PubMed Central journal article supplement (PMC4507878; doi:10.1371/journal.pone.0132259), 2015-07-20
Supplement: pone.0132259.s002.pdf [file pone.0132259.s002.pdf]

**S1 Table. Numbers subjects with available RNA data at each time point after viral exposure in each viral cohort.**

| Time (hours) | H1N1 | H3N2 | HRV | RSV |
|--------------|------|------|-----|-----|
| 0 (baseline) | 24   | 32   | 38  | 37  |
| 4            | 0    | 0    | 19  | 0   |
| 5            | 24   | 17   | 0   | 8   |
| 8            | 0    | 0    | 16  | 0   |
| 12           | 24   | 17   | 20  | 19  |
| 16           | 0    | 0    | 20  | 0   |
| 20           | 0    | 0    | 20  | 0   |
| 21.5         | 24   | 15   | 0   | 8   |
| 24           | 0    | 0    | 18  | 0   |
| 29           | 23   | 15   | 0   | 18  |
| 30           | 0    | 0    | 20  | 0   |
| 36           | 23   | 15   | 18  | 8   |
| 42           | 0    | 0    | 19  | 0   |
| 45.5         | 23   | 15   | 0   | 8   |
| 48           | 0    | 0    | 19  | 0   |
| 53           | 22   | 16   | 0   | 8   |
| 60           | 24   | 15   | 0   | 8   |
| 69.5         | 23   | 17   | 0   | 8   |
| 72           | 0    | 0    | 20  | 0   |
| 77           | 24   | 16   | 0   | 8   |
| 84           | 24   | 15   | 0   | 8   |
| 93.5         | 24   | 17   | 0   | 8   |
| 96           | 0    | 0    | 20  | 0   |
| 101          | 24   | 17   | 0   | 8   |
| 108          | 24   | 15   | 0   | 8   |
| 118          | 0    | 0    | 0   | 17  |
| 125          | 0    | 0    | 0   | 7   |
| 132          | 0    | 0    | 0   | 7   |
| 142          | 0    | 0    | 0   | 20  |
| 166          | 0    | 0    | 0   | 8   |
